# Supplementary material for: Role of Stereochemistry on the Biological Activity of Nature-Inspired 3-Br-Acivicin Isomers and Derivatives
Source: MDPI journal article supplement (doi:10.3390/molecules28073172), 2023-04-03

## SUPPORTING INFORMATION

# Role of Stereochemistry on the Biological Activity of Nature-Inspired 3-Br-Acivicin Isomers and Derivatives

Andrea Galbiati <sup>1,†</sup>, Aureliano Zana <sup>1,†</sup>, Chiara Borsari <sup>1</sup>, Marco Persico <sup>2</sup>, Stefania Bova <sup>3</sup>, Oleh Tkachuk <sup>2</sup>, Alexandra Ioana Corfu <sup>1</sup>, Lucia Tamborini <sup>1</sup>, Nicoletta Basilico <sup>4</sup>, Caterina Fattorusso <sup>2</sup>, Stefano Bruno <sup>5</sup>, Silvia Parapini <sup>6</sup> and Paola Conti <sup>1,\*</sup>

### Table of Content

|                                                                                                                                                                                                                                                                                                                                             |     |
|---------------------------------------------------------------------------------------------------------------------------------------------------------------------------------------------------------------------------------------------------------------------------------------------------------------------------------------------|-----|
| <b>Table S1.</b> clogD <sub>7.4</sub> , pK <sub>a</sub> values and percentage of ionic forms at pH 7.2.....                                                                                                                                                                                                                                 | S4  |
| <b>Table S2.</b> ΔE <sub>GM</sub> values (kcal/mol) and torsional angle values (degrees) of <b>1a</b> considering MM conformers within 5 kcal/mol from the global minimum.....                                                                                                                                                              | S5  |
| <b>Table S3.</b> ΔE <sub>GM</sub> values (kcal/mol) and torsional angle values (degrees) of <b>1b</b> considering MM conformers within 5 kcal/mol from the global minimum.....                                                                                                                                                              | S6  |
| <b>Table S4.</b> ΔE <sub>GM</sub> values (kcal/mol) and torsional angle values (degrees) of <b>1c</b> considering MM conformers within 5 kcal/mol from the global minimum.....                                                                                                                                                              | S7  |
| <b>Table S5.</b> ΔE <sub>GM</sub> values (kcal/mol) and torsional angle values (degrees) of <b>1d</b> considering MM conformers within 5 kcal/mol from the global minimum.....                                                                                                                                                              | S8  |
| <b>Table S6.</b> ΔE <sub>GM</sub> values (kcal/mol) and torsional angle values (degrees) of <b>2b</b> considering MM conformers within 5 kcal/mol from the global minimum.....                                                                                                                                                              | S9  |
| <b>Table S7.</b> ΔE <sub>GM</sub> values (kcal/mol) and torsional angle values (degrees) of <b>2c</b> considering MM conformers within 5 kcal/mol from the global minimum.....                                                                                                                                                              | S10 |
| <b>Table S8.</b> ΔE <sub>GM</sub> values (kcal/mol) and torsional angle values (degrees) of <b>2d</b> considering MM conformers within 5 kcal/mol from the global minimum.....                                                                                                                                                              | S11 |
| <b>Table S9.</b> ΔE <sub>GM</sub> values (kcal/mol) and torsional angle values (degrees) of <b>3b</b> considering MM conformers within 5 kcal/mol from the global minimum.....                                                                                                                                                              | S12 |
| <b>Table S10.</b> ΔE <sub>GM</sub> values (kcal/mol) and torsional angle values (degrees) of <b>3c</b> considering MM conformers within 5 kcal/mol from the global minimum.....                                                                                                                                                             | S13 |
| <b>Table S11.</b> ΔE <sub>GM</sub> values (kcal/mol) and torsional angle values (degrees) of <b>3d</b> considering MM conformers within 5 kcal/mol from the global minimum.....                                                                                                                                                             | S14 |
| <b>Table S12.</b> ΔE <sub>GM</sub> values (kcal/mol) and torsional angle values (degrees) of <b>4b</b> considering MM conformers within 5 kcal/mol from the global minimum.....                                                                                                                                                             | S15 |
| <b>Table S13.</b> ΔE <sub>GM</sub> values (kcal/mol) and torsional angle values (degrees) of <b>4c</b> considering MM conformers within 5 kcal/mol from the global minimum.....                                                                                                                                                             | S16 |
| <b>Table S14.</b> ΔE <sub>GM</sub> values (kcal/mol) and torsional angle values (degrees) of <b>4d</b> considering MM conformers within 5 kcal/mol from the global minimum.....                                                                                                                                                             | S17 |
| <b>Table S15.</b> Non-bond interaction energies (kcal/mol), Cα RMSD (Å) of C153 and H180 calculated with respect to the starting position. χ1 torsion angle of C153 (degrees) and angle values of the hydrogen bond between C153 and H180 (degrees) of the <b>1a</b> /PfGAPDH complexes obtained by Monte Carlo/Minimization procedure..... | S18 |
| <b>Table S16.</b> Non-bond interaction energies (kcal/mol), Cα RMSD (Å) of C153 and H180 calculated with respect to the starting position. χ1 torsion angle of C153 (degrees) and angle values of the hydrogen bond between C153 and H180 (degrees) of the <b>1b</b> /PfGAPDH complexes.....                                                | S19 |



|                                                                                                                                                                                                                                                                 |     |
|-----------------------------------------------------------------------------------------------------------------------------------------------------------------------------------------------------------------------------------------------------------------|-----|
| <b>Table S32.</b> Summary of Procheck results obtained for the selected docked complexes.....                                                                                                                                                                   | S35 |
| <b>Table S33.</b> Calculated RMSD (Å) of the ligand conformation in the docked complexes with respect to the conformers obtained by the conformational analysis. The energy difference (ΔE) from the global minimum energy conformer (GM) is also reported..... | S36 |
| <b>Table S34.</b> Solvent accessible surface area (SASA) of bromine for the selected docked complexes.....                                                                                                                                                      | S37 |
| <b>Table S35.</b> Ligand-residue interactions of the <i>Pf</i> GAPDH/ <b>1a</b> , <i>Pf</i> GAPDH/ <b>1b</b> , <i>Pf</i> GAPDH/ <b>1c</b> , and <i>Pf</i> GAPDH/ <b>1d</b> docked complexes.....                                                                | S38 |
| <b>Table S36.</b> Ligand-residue interactions of the <i>Pf</i> GAPDH/ <b>2a</b> , <i>Pf</i> GAPDH/ <b>2b</b> , <i>Pf</i> GAPDH/ <b>2c</b> , and <i>Pf</i> GAPDH/ <b>2d</b> docked complexes.....                                                                | S39 |
| <b>Table S37.</b> Ligand-residue interactions of the <i>Pf</i> GAPDH/ <b>3a</b> , <i>Pf</i> GAPDH/ <b>3b</b> , <i>Pf</i> GAPDH/ <b>3c</b> , and <i>Pf</i> GAPDH/ <b>3d</b> docked complexes.....                                                                | S40 |
| <b>Table S38.</b> Ligand-residue interactions of the <i>Pf</i> GAPDH/ <b>4a</b> , <i>Pf</i> GAPDH/ <b>4b</b> , <i>Pf</i> GAPDH/ <b>4c</b> , and <i>Pf</i> GAPDH/ <b>4d</b> docked complexes.....                                                                | S41 |
| <b>Figure S1.</b> Docked complexes of <b>2a</b> (orange), <b>2b</b> (yellow), <b>2c</b> (green) and <b>2d</b> (magenta) bound to P <sub>I</sub> site of <i>Pf</i> GAPDH.....                                                                                    | S42 |
| <b>Figure S2.</b> Docked complexes of <b>2a</b> (orange), <b>2b</b> (yellow), <b>2c</b> (green) and <b>2d</b> (magenta) bound to P <sub>II</sub> site of <i>Pf</i> GAPDH.....                                                                                   | S43 |
| <b>Figure S3.</b> Docked complexes of <b>3a</b> (orange), <b>3b</b> (yellow), <b>3c</b> (green) and <b>3d</b> (magenta) bound to P <sub>I</sub> site of <i>Pf</i> GAPDH.....                                                                                    | S44 |
| <b>Figure S4.</b> Docked complexes of <b>3a</b> (orange), <b>3b</b> (yellow), <b>3c</b> (green) and <b>3d</b> (magenta) bound to P <sub>II</sub> site of <i>Pf</i> GAPDH.....                                                                                   | S45 |
| <b>Figure S5.</b> Docked complexes of <b>1a</b> (orange), <b>1b</b> (yellow), <b>1c</b> (green) and <b>1d</b> (magenta) bound to P <sub>I</sub> site of <i>Pf</i> GAPDH.....                                                                                    | S46 |
| <b>Figure S6.</b> Docked complexes of <b>1a</b> (orange), <b>1b</b> (yellow), <b>1c</b> (green) and <b>1d</b> (magenta) bound to P <sub>II</sub> site of <i>Pf</i> GAPDH.....                                                                                   | S47 |
| <b>Figure S7.</b> Docked complexes of <b>4a</b> (orange), <b>4b</b> (yellow), <b>4c</b> (green) and <b>4d</b> (magenta) bound to P <sub>I</sub> site of <i>Pf</i> GAPDH.....                                                                                    | S48 |
| <b>Figure S8.</b> Docked complexes of <b>4a</b> (orange), <b>4b</b> (yellow), <b>4c</b> (green) and <b>4d</b> (magenta) bound to P <sub>II</sub> site of <i>Pf</i> GAPDH.....                                                                                   | S49 |
| <b>Figure S9.</b> Superimposition of the two <b>4c</b> conformations obtained from docking studies on the corresponding local energy minimum conformer obtained from conformational analysis.....                                                               | S50 |
| <b>Figure S10.</b> Superimposition of the two <b>4c</b> conformations obtained from docking studies on the global energy minimum conformer obtained from the conformational analysis.....                                                                       | S51 |
| <sup>1</sup> H and <sup>13</sup> C NMR spectra of final compounds.....                                                                                                                                                                                          | S52 |

**Table S1.** clogD<sub>7.4</sub>, pK<sub>a</sub> values and percentage of ionic forms at pH 7.2.

| Compd        | clogD <sub>7.4</sub> | pK <sub>a</sub> | Prevalent<br>Ionic Form (%) |
|--------------|----------------------|-----------------|-----------------------------|
| <b>1a-1d</b> | 0.02                 | 2.0 ± 0.4       | ZW(100)                     |
|              |                      | 9.3 ± 0.4       |                             |
| <b>2a-2d</b> | 0.04                 | 7.2 ± 0.4       | N(49)                       |
|              |                      |                 | P(51)                       |
| <b>3a-3d</b> | 1.41                 | 7.3 ± 0.4       | N(47)                       |
|              |                      |                 | P(53)                       |
| <b>4a-4d</b> | 0.76                 | 7.4 ± 0.4       | N (39)                      |
|              |                      | 12.1 ± 1.0      | P(61)                       |



**Table S3.**  $\Delta E_{\text{GM}}$  values (kcal/mol) and torsional angle values (degrees) of **1b** considering MM conformers within 5 kcal/mol from the global minimum.

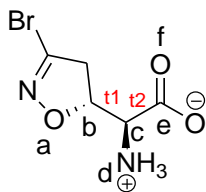

| Frame | $\Delta E_{\text{GM}}$<br>(kcal/mol) | Torsional Angles ( $^{\circ}$ ) |            |
|-------|--------------------------------------|---------------------------------|------------|
|       |                                      | $\tau 1^a$                      | $\tau 2^b$ |
| 1     | 0                                    | 72                              | -5         |
| 2     | 1.92                                 | -173                            | 5          |
| 3     | 4.13                                 | -53                             | 3          |

<sup>a</sup> $\tau 1$ : abcd; <sup>b</sup> $\tau 2$ : dcef

**Table S4.**  $\Delta E_{\text{GM}}$  values (kcal/mol) and torsional angle values (degrees) of **1c** considering MM conformers within 5 kcal/mol from the global minimum.

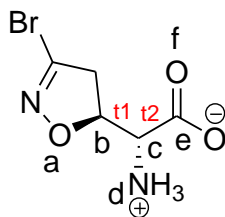

| Frame | $\Delta E_{\text{GM}}$<br>(kcal/mol) | Torsional Angles (°) |            |
|-------|--------------------------------------|----------------------|------------|
|       |                                      | $\tau 1^a$           | $\tau 2^b$ |
| 1     | 0                                    | -72                  | 4          |
| 11    | 1.92                                 | 173                  | -4         |
| 23    | 4.13                                 | 53                   | -3         |

<sup>a</sup> $\tau 1$ : abcd; <sup>b</sup> $\tau 2$ : dcef

**Table S5.**  $\Delta E_{\text{GM}}$  values (kcal/mol) and torsional angle values (degrees) of **1d** considering MM conformers within 5 kcal/mol from the global minimum.

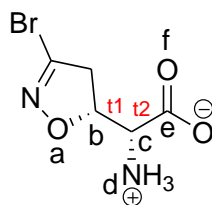

| Frame | $\Delta E_{\text{GM}}$<br>(kcal/mol) | Torsional Angles (°) |            |
|-------|--------------------------------------|----------------------|------------|
|       |                                      | $\tau 1^a$           | $\tau 2^b$ |
| 1     | 0                                    | -80                  | -2         |
| 13    | 0.41                                 | -176                 | 10         |
| 25    | 1.51                                 | 62                   | -2         |

<sup>a</sup> $\tau 1$ : abcd; <sup>b</sup> $\tau 2$ : dcef



**Table S6.**  $\Delta E_{\text{GM}}$  values (kcal/mol) and torsional angle values (degrees) of **2b** considering MM conformers within 5 kcal/mol from the global minimum.

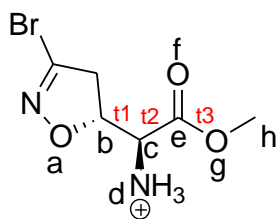

| Frame | $\Delta E_{\text{GM}}$<br>(kcal/mol) | Torsional Angles ( $^{\circ}$ ) |            |            |
|-------|--------------------------------------|---------------------------------|------------|------------|
|       |                                      | $\tau 1^a$                      | $\tau 2^b$ | $\tau 3^c$ |
| 1     | 0                                    | -62                             | -90        | -1         |
| 2     | 0.26                                 | -176                            | -96        | -1         |
| 3     | 0.76                                 | 62                              | -95        | -1         |
| 4     | 0.79                                 | -63                             | 95         | 1          |
| 5     | 1.53                                 | -178                            | 84         | 1          |
| 6     | 1.99                                 | 63                              | 99         | 1          |

<sup>a</sup> $\tau 1$ : abcd; <sup>b</sup> $\tau 2$ : dcef; <sup>c</sup> $\tau 3$ : fegh

**Table S7.**  $\Delta E_{\text{GM}}$  values (kcal/mol) and torsional angle values (degrees) of **2c** considering MM conformers within 5 kcal/mol from the global minimum.

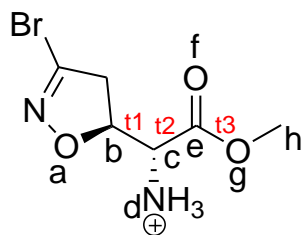

| Frame | $\Delta E_{\text{GM}}$<br>(kcal/mol) | Torsional Angles ( $^{\circ}$ ) |            |            |
|-------|--------------------------------------|---------------------------------|------------|------------|
|       |                                      | $\tau 1^a$                      | $\tau 2^b$ | $\tau 3^c$ |
| 1     | 0                                    | 62                              | 90         | 1          |
| 2     | 0.26                                 | 176                             | 96         | 1          |
| 3     | 0.76                                 | -62                             | 95         | 1          |
| 4     | 0.79                                 | 63                              | -95        | -1         |
| 5     | 1.53                                 | 178                             | -84        | -1         |
| 6     | 1.99                                 | -63                             | -99        | -1         |

<sup>a</sup> $\tau 1$ : abcd; <sup>b</sup> $\tau 2$ : dcef; <sup>c</sup> $\tau 3$ : fegh

**Table S8.**  $\Delta E_{\text{GM}}$  values (kcal/mol) and torsional angle values (degrees) of **2d** considering MM conformers within 5 kcal/mol from the global minimum.

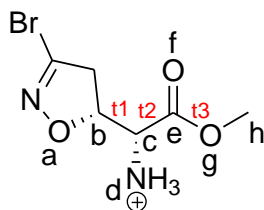

| Frame | $\Delta E_{\text{GM}}$<br>(kcal/mol) | Torsional Angles ( $^{\circ}$ ) |            |            |
|-------|--------------------------------------|---------------------------------|------------|------------|
|       |                                      | $\tau 1^a$                      | $\tau 2^b$ | $\tau 3^c$ |
| 1     | 0                                    | -179                            | 89         | 1          |
| 2     | 0.16                                 | -66                             | 89         | 1          |
| 3     | 0.94                                 | -178                            | -96        | -1         |
| 4     | 1.09                                 | -65                             | -97        | -2         |
| 5     | 1.26                                 | 61                              | 95         | 1          |
| 6     | 2.41                                 | 62                              | -94        | -1         |

<sup>a</sup> $\tau 1$ : abcd; <sup>b</sup> $\tau 2$ : dcef; <sup>c</sup> $\tau 3$ : fegh

**Table S9.**  $\Delta E_{\text{GM}}$  values (kcal/mol) and torsional angle values (degrees) of **3b** considering MM conformers within 5 kcal/mol from the global minimum.

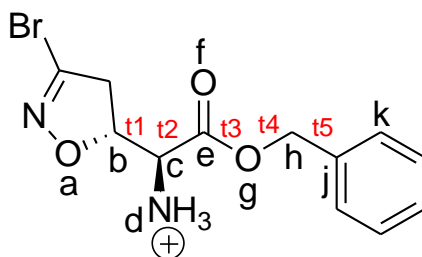

| Frame | $\Delta E_{\text{GM}}$<br>(kcal/mol) | Torsional Angles (°) |            |            |            |            |
|-------|--------------------------------------|----------------------|------------|------------|------------|------------|
|       |                                      | $\tau_1^a$           | $\tau_2^b$ | $\tau_3^c$ | $\tau_4^d$ | $\tau_5^e$ |
| 1     | 0                                    | -178                 | 82         | 3          | 171        | -88        |
| 2     | 0.22                                 | -62                  | -89        | -1         | -179       | -90        |
| 3     | 0.48                                 | -63                  | -86        | -3         | -82        | 106        |
| 4     | 0.48                                 | -176                 | -96        | -1         | -179       | 90         |
| 5     | 0.67                                 | -64                  | 94         | 2          | 176        | 93         |
| 6     | 0.80                                 | -62                  | -90        | -1         | 85         | -105       |
| 7     | 0.81                                 | -179                 | 100        | 7          | 96         | -91        |
| 8     | 0.83                                 | -64                  | 96         | 4          | 84         | 75         |
| 9     | 0.86                                 | -176                 | -92        | -2         | -82        | -74        |
| 10    | 0.98                                 | -176                 | -97        | 0          | 84         | -106       |
| 11    | 1.02                                 | 62                   | -95        | -1         | -179       | 90         |
| 12    | 1.14                                 | -174                 | -54        | -8         | -76        | -71        |
| 13    | 1.50                                 | -63                  | 95         | 1          | -86        | -75        |
| 14    | 1.54                                 | 62                   | -95        | 0          | 84         | 75         |
| 15    | 1.58                                 | 62                   | -93        | -1         | -84        | -75        |
| 16    | 1.77                                 | 63                   | 99         | 2          | 177        | -87        |
| 17    | 1.90                                 | -177                 | 78         | 0          | -89        | 103        |
| 18    | 2.33                                 | 64                   | 106        | 4          | 85         | 73         |
| 19    | 2.65                                 | 62                   | 98         | 1          | -86        | 105        |

<sup>a</sup> $\tau_1$ : abcd; <sup>b</sup> $\tau_2$ : dcef; <sup>c</sup> $\tau_3$ : fegh; <sup>d</sup> $\tau_4$ : eghj; <sup>e</sup> $\tau_5$ : ghjk

**Table S10.**  $\Delta E_{\text{GM}}$  values (kcal/mol) and torsional angle values (degrees) of **3c** considering MM conformers within 5 kcal/mol from the global minimum.

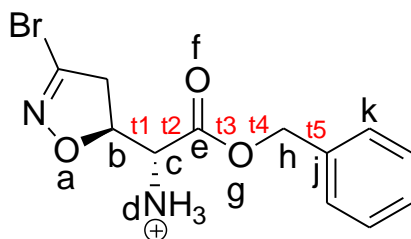

| Frame | $\Delta E_{\text{GM}}$<br>(kcal/mol) | Torsional Angles (°) |            |            |            |            |
|-------|--------------------------------------|----------------------|------------|------------|------------|------------|
|       |                                      | $\tau 1^a$           | $\tau 2^b$ | $\tau 3^c$ | $\tau 4^d$ | $\tau 5^e$ |
| 1     | 0                                    | 178                  | -82        | -3         | -171       | -91        |
| 2     | 0.22                                 | 62                   | 89         | 1          | 179        | -90        |
| 3     | 0.48                                 | 63                   | 86         | 3          | 82         | 74         |
| 4     | 0.48                                 | 176                  | 96         | 1          | 179        | -90        |
| 5     | 0.67                                 | 64                   | -94        | -2         | -176       | -93        |
| 6     | 0.80                                 | 62                   | 90         | 1          | -85        | 105        |
| 7     | 0.81                                 | 179                  | -100       | -7         | -96        | 91         |
| 8     | 0.83                                 | 64                   | -96        | -4         | -84        | -75        |
| 9     | 0.86                                 | 176                  | 92         | 2          | 82         | 74         |
| 10    | 0.98                                 | 176                  | 97         | 0          | -84        | 106        |
| 11    | 1.02                                 | -62                  | 95         | 1          | 179        | -90        |
| 12    | 1.14                                 | 174                  | 54         | 8          | 76         | 71         |
| 13    | 1.50                                 | 63                   | -95        | -1         | 86         | -105       |
| 14    | 1.54                                 | -62                  | 95         | 0          | -85        | 105        |
| 15    | 1.58                                 | -62                  | 93         | 1          | 84         | 75         |
| 16    | 1.77                                 | -63                  | -100       | -2         | -178       | -93        |
| 17    | 1.90                                 | 177                  | -78        | 0          | 89         | 76         |
| 18    | 2.33                                 | -64                  | -106       | -4         | -85        | -73        |
| 19    | 2.65                                 | -62                  | -98        | -1         | 86         | -105       |

<sup>a</sup> $\tau 1$ : abcd; <sup>b</sup> $\tau 2$ : dcef; <sup>c</sup> $\tau 3$ : fegh; <sup>d</sup> $\tau 4$ : eghj; <sup>e</sup> $\tau 5$ : ghjk

**Table S11.**  $\Delta E_{\text{GM}}$  values (kcal/mol) and torsional angle values (degrees) of **3d** considering MM conformers within 5 kcal/mol from the global minimum.

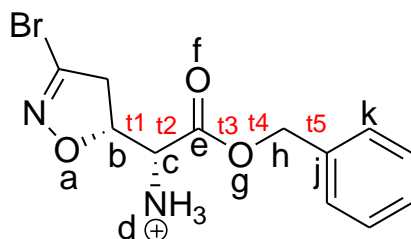

| Frame | $\Delta E_{\text{GM}}$<br>(kcal/mol) | Torsional Angles (°) |            |            |            |            |
|-------|--------------------------------------|----------------------|------------|------------|------------|------------|
|       |                                      | $\tau 1^a$           | $\tau 2^b$ | $\tau 3^c$ | $\tau 4^d$ | $\tau 5^e$ |
| 1     | 0                                    | -66                  | -104       | -5         | -93        | 95         |
| 2     | 0.08                                 | -64                  | -91        | -4         | -168       | 88         |
| 3     | 0.26                                 | -67                  | 71         | 6          | 77         | 71         |
| 4     | 0.37                                 | -179                 | 89         | 1          | 179        | -90        |
| 5     | 0.51                                 | -66                  | 89         | 1          | 179        | -90        |
| 6     | 0.80                                 | -179                 | 87         | 2          | 83         | 74         |
| 7     | 0.93                                 | -179                 | 89         | 1          | -85        | -75        |
| 8     | 0.98                                 | -178                 | -94        | -2         | -177       | -93        |
| 9     | 1.03                                 | -66                  | 90         | 1          | -84        | 106        |
| 10    | 1.27                                 | -177                 | -97        | -5         | -83        | -72        |
| 11    | 1.65                                 | 61                   | 95         | 1          | 179        | 90         |
| 12    | 1.76                                 | -64                  | -94        | -2         | 87         | -105       |
| 13    | 1.78                                 | -178                 | -95        | -1         | 86         | 75         |
| 14    | 2.17                                 | 61                   | 95         | 0          | -84        | -74        |
| 15    | 2.21                                 | 61                   | 93         | 1          | 84         | 75         |
| 16    | 2.22                                 | 62                   | -95        | -2         | -178       | 87         |
| 17    | 2.90                                 | 62                   | -100       | -3         | -86        | -75        |
| 18    | 3.16                                 | 62                   | -92        | 0          | 86         | 75         |

<sup>a</sup> $\tau 1$ : abcd; <sup>b</sup> $\tau 2$ : dcef; <sup>c</sup> $\tau 3$ : fegh; <sup>d</sup> $\tau 4$ : eghj; <sup>e</sup> $\tau 5$ : ghjk

**Table S12.**  $\Delta E_{\text{GM}}$  values (kcal/mol) and torsional angle values (degrees) of **4b** considering MM conformers within 5 kcal/mol from the global minimum.

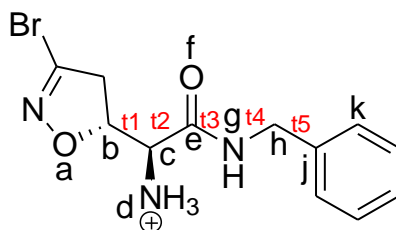

| Frame | $\Delta E_{\text{GM}}$<br>(kcal/mol) | Torsional Angles (°) |            |            |            |            |
|-------|--------------------------------------|----------------------|------------|------------|------------|------------|
|       |                                      | $\tau_1^a$           | $\tau_2^b$ | $\tau_3^c$ | $\tau_4^d$ | $\tau_5^e$ |
| 1     | 0                                    | -66                  | -88        | 0          | -179       | -90        |
| 2     | 0.62                                 | 61                   | -90        | -1         | 179        | -90        |
| 3     | 0.87                                 | 178                  | -93        | -1         | 179        | 90         |
| 4     | 1.02                                 | 177                  | 87         | 2          | 165        | 95         |
| 5     | 1.65                                 | -66                  | 98         | 0          | 174        | 93         |
| 6     | 1.85                                 | 63                   | 100        | 1          | 178        | -87        |
| 7     | 2.20                                 | -178                 | -45        | -6         | -95        | -92        |

<sup>a</sup> $\tau_1$ : abcd; <sup>b</sup> $\tau_2$ : dcef; <sup>c</sup> $\tau_3$ : fegh; <sup>d</sup> $\tau_4$ : eghj; <sup>e</sup> $\tau_5$ : ghjk

**Table S13.**  $\Delta E_{\text{GM}}$  values (kcal/mol) and torsional angle values (degrees) of **4c** considering MM conformers within 5 kcal/mol from the global minimum.

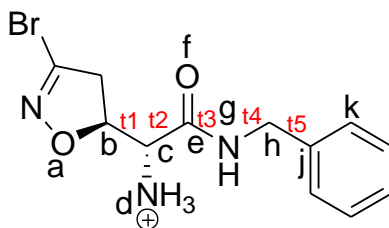

| Frame | $\Delta E_{\text{GM}}$<br>(kcal/mol) | Torsional Angles (°) |            |            |            |            |
|-------|--------------------------------------|----------------------|------------|------------|------------|------------|
|       |                                      | $\tau 1^a$           | $\tau 2^b$ | $\tau 3^c$ | $\tau 4^d$ | $\tau 5^e$ |
| 1     | 0                                    | 66                   | 88         | 0          | 179        | 90         |
| 2     | 0.62                                 | -61                  | 90         | 1          | -179       | 90         |
| 3     | 0.87                                 | -178                 | 93         | 1          | -179       | -90        |
| 4     | 1.02                                 | -177                 | -87        | -2         | -165       | -95        |
| 5     | 1.65                                 | 66                   | -98        | 0          | -174       | -93        |
| 6     | 1.85                                 | -63                  | -100       | -1         | -178       | 87         |
| 7     | 2.20                                 | 178                  | 45         | 6          | 95         | 92         |

<sup>a</sup> $\tau 1$ : abcd; <sup>b</sup> $\tau 2$ : dcef; <sup>c</sup> $\tau 3$ : fegh; <sup>d</sup> $\tau 4$ : eghj; <sup>e</sup> $\tau 5$ : ghjk



**Table S14.**  $\Delta E_{\text{GM}}$  values (kcal/mol) and torsional angle values (degrees) of **4d** considering MM conformers within 5 kcal/mol from the global minimum.

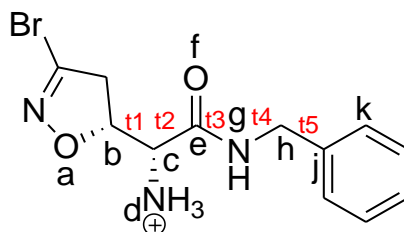

| Frame | $\Delta E_{\text{GM}}$<br>(kcal/mol) | Torsional Angles (°) |            |            |            |            |
|-------|--------------------------------------|----------------------|------------|------------|------------|------------|
|       |                                      | $\tau_1^a$           | $\tau_2^b$ | $\tau_3^c$ | $\tau_4^d$ | $\tau_5^e$ |
| 1     | 0                                    | -175                 | 88         | 1          | 180        | 90         |
| 2     | 0.31                                 | -65                  | 85         | 1          | 179        | -90        |
| 3     | 0.47                                 | -64                  | -95        | -2         | -151       | -94        |
| 4     | 0.73                                 | -66                  | 68         | 5          | 100        | -83        |
| 5     | 1.13                                 | 67                   | 91         | 0          | -179       | -90        |
| 6     | 1.44                                 | -174                 | -96        | -1         | -176       | -92        |
| 7     | 2.68                                 | 66                   | -101       | 0          | -176       | 87         |

<sup>a</sup> $\tau_1$ : abcd; <sup>b</sup> $\tau_2$ : dcef; <sup>c</sup> $\tau_3$ : fegh; <sup>d</sup> $\tau_4$ : eghj; <sup>e</sup> $\tau_5$ : ghjk

**Table S15.** Non-bond interaction energies (kcal/mol), C $\alpha$  RMSD (Å) of C153 and H180 calculated with respect to the starting position.  $\chi_1$  torsion angle of C153 (degrees) and angle values of the hydrogen bond between C153 and H180 (degrees) of the **1a**/*Pf*GAPDH complexes obtained by Monte Carlo/Minimization procedure.

| Complex              | Binding approach | Nonbond interaction energies (kcal/mol) | RMSD (C153) | RMSD (H180) | $\chi_1$ (C153) | Angle value of the hydrogen bond between C153 and H180 |                  |
|----------------------|------------------|-----------------------------------------|-------------|-------------|-----------------|--------------------------------------------------------|------------------|
|                      |                  |                                         |             |             |                 | DHA <sup>a</sup>                                       | XDA <sup>a</sup> |
| <b>1<sup>b</sup></b> | BA1              | -12.787                                 | 0.24        | 0.47        | -68.15          | 107.27                                                 | 133.35           |
| <b>2</b>             | BA1              | -0.490                                  | 0.35        | 0.54        | -63.70          | 102.57                                                 | 112.40           |
| <b>3</b>             | BA1              | -4.136                                  | 1.24        | 0.57        | -53.26          | 122.06                                                 | 70.29            |
| <b>4</b>             | BA1              | 2.226                                   | 2.66        | 0.57        | -41.90          | 139.49                                                 | 69.51            |
| <b>5</b>             | BA1              | -6.721                                  | 1.66        | 0.57        | -40.81          | 118.89                                                 | 74.26            |
| <b>6</b>             | BA1              | 24.204                                  | 6.87        | 1.47        | 92.35           | 124.04                                                 | 67.38            |
| <b>7<sup>b</sup></b> | BA2              | -7.784                                  | 0.12        | 0.52        | -63.39          | 128.94                                                 | 140.45           |
| <b>8</b>             | BA2              | -1.749                                  | 0.21        | 0.58        | -73.08          | 108.80                                                 | 130.48           |
| <b>9</b>             | BA2              | 1.988                                   | 0.83        | 0.54        | -93.17          | 138.56                                                 | 109.63           |
| <b>10</b>            | BA2              | -5.467                                  | 1.08        | 0.52        | -89.71          | 135.43                                                 | 87.03            |
| <b>11</b>            | BA2              | -7.428                                  | 1.36        | 0.48        | -92.59          | 125.57                                                 | 84.99            |
| <b>12</b>            | BA2              | 27.011                                  | 4.95        | 0.88        | 77.68           | 135.22                                                 | 74.64            |
| <b>13</b>            | BA2              | 17.364                                  | 4.68        | 0.85        | 85.56           | 116.79                                                 | 66.86            |
| <b>14</b>            | BA2              | 18.129                                  | 4.67        | 0.97        | 69.39           | 135.49                                                 | 67.55            |

<sup>a</sup> D: S $\gamma$  of C153; A: N $\tau$  of H180; H: H $\gamma$  of C153; X: C $\beta$  of C153. <sup>b</sup>Selected complex.

**Table S16.** Non-bond interaction energies (kcal/mol), C $\alpha$  RMSD (Å) of C153 and H180 calculated with respect to the starting position.  $\chi_1$  torsion angle of C153 (degrees) and angle values of the hydrogen bond between C153 and H180 (degrees) of the **1b**/PfGAPDH complexes obtained by Monte Carlo/Minimization procedure.

| Complex              | Binding approach | Nonbond interaction energies (kcal/mol) | RMSD (C153) | RMSD (H180) | $\chi_1$ (C153) | Angle value of the hydrogen bond between C153 and H180 |                  |
|----------------------|------------------|-----------------------------------------|-------------|-------------|-----------------|--------------------------------------------------------|------------------|
|                      |                  |                                         |             |             |                 | DHA <sup>a</sup>                                       | XDA <sup>a</sup> |
| <b>1<sup>b</sup></b> | BA1              | -15.430                                 | 0.12        | 0.57        | -62.57          | 113.40                                                 | 127.96           |
| <b>2</b>             | BA1              | 4.574                                   | 0.27        | 0.59        | -54.73          | 138.45                                                 | 99.78            |
| <b>3</b>             | BA1              | 0.424                                   | 0.94        | 0.56        | -70.10          | 139.76                                                 | 74.75            |
| <b>4</b>             | BA1              | -3.611                                  | 0.53        | 0.56        | -60.66          | 134.21                                                 | 90.44            |
| <b>5</b>             | BA1              | -2.849                                  | 0.39        | 0.59        | -59.05          | 130.99                                                 | 99.42            |
| <b>6</b>             | BA1              | 31.598                                  | 4.51        | 0.83        | -35.77          | 89.01                                                  | 109.12           |
| <b>7</b>             | BA1              | 18.838                                  | 4.86        | 0.99        | -31.67          | 93.82                                                  | 117.46           |
| <b>8</b>             | BA1              | 1.636                                   | 4.83        | 0.99        | 67.56           | 146.63                                                 | 74.65            |
| <b>9<sup>b</sup></b> | BA2              | -9.844                                  | 0.14        | 0.48        | -62.82          | 112.25                                                 | 133.74           |
| <b>10</b>            | BA2              | 4.410                                   | 0.33        | 0.72        | -48.31          | 128.56                                                 | 123.95           |
| <b>11</b>            | BA2              | 8.788                                   | 0.64        | 0.64        | -66.20          | 161.22                                                 | 92.79            |
| <b>12</b>            | BA2              | -2.394                                  | 0.78        | 0.34        | -79.24          | 139.30                                                 | 70.09            |
| <b>13</b>            | BA2              | -3.040                                  | 1.24        | 0.34        | -90.68          | 127.06                                                 | 68.91            |
| <b>14</b>            | BA2              | 35.219                                  | 5.05        | 1.00        | 80.26           | 133.52                                                 | 63.68            |
| <b>15</b>            | BA2              | 12.227                                  | 4.95        | 0.63        | 78.26           | 132.08                                                 | 65.68            |
| <b>16</b>            | BA2              | 9.355                                   | 4.68        | 0.74        | 71.70           | 136.04                                                 | 69.73            |

<sup>a</sup> D: S $\gamma$  of C153; A: N $\tau$  of H180; H: H $\gamma$  of C153; X: C $\beta$  of C153. <sup>b</sup> Selected complex.

**Table S17.** Non-bond interaction energies (kcal/mol), C $\alpha$  RMSD (Å) of C153 and H180 calculated with respect to the starting position.  $\chi_1$  torsion angle of C153 (degrees) and angle values of the hydrogen bond between C153 and H180 (degrees) of the **1c**/PfGAPDH complexes obtained by Monte Carlo/Minimization procedure.

| Complex              | Binding approach | Nonbond interaction energies (kcal/mol) | RMSD (C153) | RMSD (H180) | $\chi_1$ (C153) | Angle value of the hydrogen bond between C153 and H180 |                  |
|----------------------|------------------|-----------------------------------------|-------------|-------------|-----------------|--------------------------------------------------------|------------------|
|                      |                  |                                         |             |             |                 | DHA <sup>a</sup>                                       | XDA <sup>a</sup> |
| <b>1<sup>b</sup></b> | BA1              | -12.473                                 | 0.16        | 0.51        | -61.97          | 112.26                                                 | 133.82           |
| <b>2</b>             | BA1              | 25.650                                  | 0.60        | 0.65        | -79.73          | 153.77                                                 | 108.07           |
| <b>3</b>             | BA1              | 2.237                                   | 1.12        | 0.85        | -59.28          | 156.62                                                 | 77.83            |
| <b>4</b>             | BA1              | 9.163                                   | 1.06        | 0.78        | -61.29          | 147.94                                                 | 82.80            |
| <b>5</b>             | BA1              | 12.473                                  | 1.05        | 0.65        | -51.53          | 135.93                                                 | 68.53            |
| <b>6</b>             | BA1              | 28.982                                  | 4.40        | 1.27        | 88.50           | 116.18                                                 | 64.38            |
| <b>7</b>             | BA1              | 13.199                                  | 4.61        | 1.28        | 86.16           | 132.40                                                 | 64.25            |
| <b>8</b>             | BA1              | 8.818                                   | 4.57        | 1.24        | 83.79           | 135.51                                                 | 66.00            |
| <b>9<sup>b</sup></b> | BA2              | -11.082                                 | 0.12        | 0.53        | -64.58          | 112.87                                                 | 126.63           |
| <b>10</b>            | BA2              | -4.452                                  | 0.11        | 0.54        | -74.39          | 129.48                                                 | 112.02           |
| <b>11</b>            | BA2              | 40.107                                  | 0.48        | 0.61        | -65.18          | 114.27                                                 | 104.23           |
| <b>12</b>            | BA2              | 5.146                                   | 0.23        | 0.82        | -62.67          | 144.60                                                 | 102.67           |
| <b>13</b>            | BA2              | 1.933                                   | 0.56        | 0.88        | -76.39          | 132.48                                                 | 94.82            |

<sup>a</sup> D: S $\gamma$  of C153; A: N $\tau$  of H180; H: H $\gamma$  of C153; X: C $\beta$  of C153. <sup>b</sup>Selected complex.

**Table S18.** Non-bond interaction energies (kcal/mol), C $\alpha$  RMSD (Å) of C153 and H180 calculated with respect to the starting position.  $\chi_1$  torsion angle of C153 (degrees) and angle values of the hydrogen bond between C153 and H180 (degrees) of the **1d**/PfGAPDH complexes obtained by Monte Carlo/Minimization procedure.

| Complex               | Binding approach | Nonbond interaction energies (kcal/mol) | RMSD (C153) | RMSD (H180) | $\chi_1$ (C153) | Angle value of the hydrogen bond between C153 and H180 |                  |
|-----------------------|------------------|-----------------------------------------|-------------|-------------|-----------------|--------------------------------------------------------|------------------|
|                       |                  |                                         |             |             |                 | DHA <sup>a</sup>                                       | XDA <sup>a</sup> |
| <b>1</b> <sup>b</sup> | BA1              | -10.032                                 | 0.19        | 0.50        | -61.41          | 114.39                                                 | 137.94           |
| <b>2</b>              | BA1              | -0.579                                  | 1.26        | 0.69        | -69.90          | 130.46                                                 | 76.79            |
| <b>3</b>              | BA1              | -2.138                                  | 1.28        | 0.58        | -82.20          | 135.07                                                 | 71.07            |
| <b>4</b>              | BA1              | 20.777                                  | 1.90        | 0.56        | -84.31          | 118.36                                                 | 72.20            |
| <b>5</b>              | BA1              | 26.030                                  | 1.35        | 0.52        | -63.35          | 116.10                                                 | 79.77            |
| <b>6</b>              | BA1              | 21.442                                  | 4.62        | 1.26        | 85.17           | 99.81                                                  | 69.98            |
| <b>7</b>              | BA1              | -2.022                                  | 4.86        | 1.27        | 97.63           | 103.16                                                 | 68.51            |
| <b>8</b>              | BA1              | 50.778                                  | 4.84        | 1.54        | 75.62           | 103.10                                                 | 72.74            |
| <b>9</b> <sup>b</sup> | BA2              | -8.062                                  | 0.15        | 0.48        | -61.26          | 110.53                                                 | 134.50           |
| <b>10</b>             | BA2              | -6.465                                  | 0.25        | 0.53        | -61.79          | 111.60                                                 | 117.97           |
| <b>11</b>             | BA2              | -0.278                                  | 0.64        | 0.57        | -102.38         | 148.38                                                 | 88.39            |
| <b>12</b>             | BA2              | 39.124                                  | 2.48        | 0.48        | -78.28          | 111.23                                                 | 79.34            |
| <b>13</b>             | BA2              | 8.782                                   | 2.13        | 0.51        | -45.91          | 87.30                                                  | 106.77           |
| <b>14</b>             | BA2              | 39.445                                  | 5.05        | 1.05        | 80.54           | 135.87                                                 | 64.80            |
| <b>15</b>             | BA2              | 14.472                                  | 5.11        | 1.06        | 79.34           | 134.48                                                 | 70.07            |
| <b>16</b>             | BA2              | 12.328                                  | 4.98        | 0.96        | 81.39           | 134.87                                                 | 69.80            |

<sup>a</sup> D: S $\gamma$  of C153; A: N $\tau$  of H180; H: H $\gamma$  of C153; X: C $\beta$  of C153. <sup>b</sup> Selected complex.

**Table S19.** Non-bond interaction energies (kcal/mol), C $\alpha$  RMSD (Å) of C153 and H180 calculated with respect to the starting position.  $\chi_1$  torsion angle of C153 (degrees) and angle values of the hydrogen bond between C153 and H180 (degrees) of the **2a**/PfGAPDH complexes obtained by Monte Carlo/Minimization procedure.

| Complex              | Binding approach | Nonbond interaction energies (kcal/mol) | RMSD (C153) | RMSD (H180) | $\chi_1$ (C153) | Angle value of the hydrogen bond between C153 and H180 |                  |
|----------------------|------------------|-----------------------------------------|-------------|-------------|-----------------|--------------------------------------------------------|------------------|
|                      |                  |                                         |             |             |                 | DHA <sup>a</sup>                                       | XDA <sup>a</sup> |
| <b>1<sup>b</sup></b> | BA1              | -6.456                                  | 0.25        | 0.48        | -67.86          | 112.40                                                 | 130.28           |
| <b>2</b>             | BA1              | 5.676                                   | 0.70        | 0.48        | -76.21          | 127.64                                                 | 80.80            |
| <b>3</b>             | BA1              | 6.487                                   | 1.56        | 0.41        | -90.21          | 135.60                                                 | 67.45            |
| <b>4</b>             | BA1              | 13.313                                  | 1.10        | 0.40        | -83.08          | 117.94                                                 | 77.10            |
| <b>5</b>             | BA1              | -3.426                                  | 0.99        | 0.41        | -71.81          | 109.15                                                 | 88.62            |
| <b>6</b>             | BA1              | 79.200                                  | 4.58        | 0.94        | 65.75           | 155.62                                                 | 80.66            |
| <b>7</b>             | BA1              | 28.746                                  | 4.48        | 0.70        | 65.07           | 149.25                                                 | 80.05            |
| <b>8</b>             | BA1              | 37.448                                  | 4.83        | 1.07        | 70.27           | 138.64                                                 | 83.55            |
| <b>9<sup>b</sup></b> | BA2              | -4.059                                  | 0.16        | 0.55        | -60.84          | 111.51                                                 | 131.29           |
| <b>10</b>            | BA2              | 7.461                                   | 0.29        | 0.60        | -60.91          | 126.66                                                 | 104.97           |
| <b>11</b>            | BA2              | -0.304                                  | 0.84        | 0.58        | -79.90          | 137.01                                                 | 79.58            |
| <b>12</b>            | BA2              | -3.161                                  | 1.06        | 0.53        | -73.20          | 134.21                                                 | 72.41            |
| <b>13</b>            | BA2              | 4.445                                   | 1.81        | 0.47        | -92.22          | 129.26                                                 | 70.39            |
| <b>14</b>            | BA2              | 25.054                                  | 4.24        | 0.74        | 78.99           | 127.04                                                 | 70.10            |
| <b>15</b>            | BA2              | 12.736                                  | 5.02        | 1.16        | 84.64           | 141.16                                                 | 70.81            |
| <b>16</b>            | BA2              | 17.483                                  | 4.88        | 1.68        | 58.29           | 162.73                                                 | 81.67            |

<sup>a</sup> D: S $\gamma$  of C153; A: N $\tau$  of H180; H: H $\gamma$  of C153; X: C $\beta$  of C153. <sup>b</sup>Selected complex.

**Table S20.** Non-bond interaction energies (kcal/mol), C $\alpha$  RMSD (Å) of C153 and H180 calculated with respect to the starting position.  $\chi_1$  torsion angle of C153 (degrees) and angle values of the hydrogen bond between C153 and H180 (degrees) of the **2b**/PfGAPDH complexes obtained by Monte Carlo/Minimization procedure.

| Complex              | Binding approach | Nonbond interaction energies (kcal/mol) | RMSD (C153) | RMSD (H180) | $\chi_1$ (C153) | Angle value of the hydrogen bond between C153 and H180 |                  |
|----------------------|------------------|-----------------------------------------|-------------|-------------|-----------------|--------------------------------------------------------|------------------|
|                      |                  |                                         |             |             |                 | DHA <sup>a</sup>                                       | XDA <sup>a</sup> |
| <b>1<sup>b</sup></b> | BA1              | -8.959                                  | 0.15        | 0.57        | -61.04          | 112.14                                                 | 130.64           |
| <b>2</b>             | BA1              | -2.976                                  | 0.43        | 0.49        | -87.28          | 138.17                                                 | 93.15            |
| <b>3</b>             | BA1              | 2.077                                   | 1.12        | 0.42        | -77.66          | 135.52                                                 | 73.21            |
| <b>4</b>             | BA1              | 4.585                                   | 0.91        | 0.41        | -71.72          | 113.99                                                 | 88.43            |
| <b>5</b>             | BA1              | -0.023                                  | 1.65        | 0.41        | -74.59          | 137.36                                                 | 67.07            |
| <b>6</b>             | BA1              | 22.756                                  | 5.29        | 0.95        | 72.96           | 131.14                                                 | 62.80            |
| <b>7</b>             | BA1              | 14.245                                  | 5.06        | 0.94        | 74.52           | 135.71                                                 | 65.98            |
| <b>8</b>             | BA1              | 16.293                                  | 5.33        | 0.99        | 71.71           | 132.16                                                 | 65.38            |
| <b>9<sup>b</sup></b> | BA2              | -4.535                                  | 0.14        | 0.47        | -62.47          | 112.81                                                 | 134.00           |
| <b>10</b>            | BA2              | -3.613                                  | 0.26        | 0.50        | -65.00          | 118.19                                                 | 105.84           |
| <b>11</b>            | BA2              | 1.014                                   | 1.75        | 0.60        | -61.81          | 126.48                                                 | 68.89            |
| <b>12</b>            | BA2              | 8.990                                   | 1.31        | 0.57        | -64.04          | 142.28                                                 | 70.25            |
| <b>13</b>            | BA2              | 4.985                                   | 1.19        | 0.57        | -63.93          | 143.07                                                 | 74.20            |
| <b>14</b>            | BA2              | 13.091                                  | 4.92        | 1.09        | 83.92           | 115.52                                                 | 68.70            |
| <b>15</b>            | BA2              | 10.630                                  | 5.02        | 1.12        | 93.69           | 118.68                                                 | 70.10            |
| <b>16</b>            | BA2              | 33.552                                  | 4.80        | 1.17        | 75.98           | 139.08                                                 | 69.67            |

<sup>a</sup> D: S $\gamma$  of C153; A: N $\tau$  of H180; H: H $\gamma$  of C153; X: C $\beta$  of C153. <sup>b</sup> Selected complex.

**Table S21.** Non-bond interaction energies (kcal/mol), C $\alpha$  RMSD (Å) of C153 and H180 calculated with respect to the starting position.  $\chi_1$  torsion angle of C153 (degrees) and angle values of the hydrogen bond between C153 and H180 (degrees) of the **2c**/PfGAPDH complexes obtained by Monte Carlo/Minimization procedure.

| Complex              | Binding approach | Nonbond interaction energies (kcal/mol) | RMSD (C153) | RMSD (H180) | $\chi_1$ (C153) | Angle value of the hydrogen bond between C153 and H180 |                  |
|----------------------|------------------|-----------------------------------------|-------------|-------------|-----------------|--------------------------------------------------------|------------------|
|                      |                  |                                         |             |             |                 | DHA <sup>a</sup>                                       | XDA <sup>a</sup> |
| <b>1<sup>b</sup></b> | BA1              | -8.864                                  | 0.22        | 0.46        | -67.21          | 105.57                                                 | 133.92           |
| <b>2</b>             | BA1              | 3.768                                   | 0.26        | 0.50        | -71.01          | 147.94                                                 | 110.36           |
| <b>3</b>             | BA1              | 2.970                                   | 0.96        | 0.46        | -75.69          | 127.68                                                 | 79.40            |
| <b>4</b>             | BA1              | -0.563                                  | 1.72        | 0.48        | -62.89          | 126.04                                                 | 69.45            |
| <b>5</b>             | BA1              | 26.933                                  | 1.10        | 0.45        | -81.72          | 122.28                                                 | 84.73            |
| <b>6</b>             | BA1              | 25.561                                  | 4.76        | 0.93        | -86.11          | 114.79                                                 | 92.87            |
| <b>7</b>             | BA1              | 18.299                                  | 5.08        | 1.12        | 19.62           | 153.27                                                 | 81.06            |
| <b>8</b>             | BA1              | 19.095                                  | 4.77        | 1.12        | 51.30           | 136.12                                                 | 67.21            |
| <b>9<sup>b</sup></b> | BA2              | -4.923                                  | 0.21        | 0.53        | -62.36          | 112.02                                                 | 131.03           |
| <b>10</b>            | BA2              | 7.479                                   | 0.16        | 0.53        | -68.48          | 118.48                                                 | 124.83           |
| <b>11</b>            | BA2              | 17.047                                  | 0.42        | 0.53        | -72.22          | 140.10                                                 | 122.65           |
| <b>12</b>            | BA2              | 2.026                                   | 1.26        | 0.40        | -88.57          | 148.12                                                 | 88.42            |
| <b>13</b>            | BA2              | 18.105                                  | 1.85        | 0.39        | -68.73          | 162.04                                                 | 106.87           |
| <b>14</b>            | BA2              | 25.608                                  | 4.89        | 0.91        | 74.95           | 142.11                                                 | 70.07            |
| <b>15</b>            | BA2              | 7.730                                   | 5.33        | 0.98        | 78.32           | 141.48                                                 | 70.86            |
| <b>16</b>            | BA2              | 23.577                                  | 5.10        | 0.97        | 73.48           | 141.95                                                 | 71.77            |

<sup>a</sup> D: S $\gamma$  of C153; A: N $\tau$  of H180; H: H $\gamma$  of C153; X: C $\beta$  of C153. <sup>b</sup>Selected complex.



**Table S22.** Non-bond interaction energies (kcal/mol), C $\alpha$  RMSD (Å) of C153 and H180 calculated with respect to the starting position.  $\chi_1$  torsion angle of C153 (degrees) and angle values of the hydrogen bond between C153 and H180 (degrees) of the **2d**/PfGAPDH complexes obtained by Monte Carlo/Minimization procedure.

| Complex              | Binding approach | Nonbond interaction energies (kcal/mol) | RMSD (C153) | RMSD (H180) | $\chi_1$ (C153) | Angle value of the hydrogen bond between C153 and H180 |                  |
|----------------------|------------------|-----------------------------------------|-------------|-------------|-----------------|--------------------------------------------------------|------------------|
|                      |                  |                                         |             |             |                 | DHA <sup>a</sup>                                       | XDA <sup>a</sup> |
| <b>1<sup>b</sup></b> | BA1              | -4.669                                  | 0.25        | 0.49        | -59.01          | 112.63                                                 | 140.69           |
| <b>2</b>             | BA1              | 6.707                                   | 0.43        | 0.57        | -52.56          | 138.01                                                 | 103.76           |
| <b>3</b>             | BA1              | -3.328                                  | 0.55        | 0.53        | -68.38          | 146.55                                                 | 87.23            |
| <b>4</b>             | BA1              | -1.624                                  | 0.42        | 0.52        | -64.00          | 139.37                                                 | 95.65            |
| <b>5</b>             | BA1              | 1.640                                   | 0.73        | 0.48        | -90.42          | 145.59                                                 | 75.79            |
| <b>6</b>             | BA1              | 27.515                                  | 4.85        | 0.95        | 73.94           | 134.68                                                 | 66.24            |
| <b>7</b>             | BA1              | 26.893                                  | 5.09        | 1.09        | 68.07           | 138.51                                                 | 66.86            |
| <b>8<sup>b</sup></b> | BA2              | -4.486                                  | 0.18        | 0.47        | -61.75          | 110.95                                                 | 136.36           |
| <b>9</b>             | BA2              | 31.233                                  | 0.80        | 0.44        | -84.66          | 162.98                                                 | 95.30            |
| <b>10</b>            | BA2              | 1.998                                   | 0.44        | 0.45        | -67.82          | 121.66                                                 | 134.07           |
| <b>11</b>            | BA2              | -2.483                                  | 0.92        | 0.79        | -73.33          | 157.78                                                 | 101.95           |
| <b>12</b>            | BA2              | 6.849                                   | 1.54        | 1.10        | -54.08          | 109.08                                                 | 88.33            |
| <b>13</b>            | BA2              | 48.071                                  | 5.45        | 1.49        | 95.08           | 102.02                                                 | 78.27            |
| <b>14</b>            | BA2              | 11.591                                  | 5.37        | 1.53        | 88.93           | 81.57                                                  | 89.24            |
| <b>15</b>            | BA2              | 5.159                                   | 5.39        | 1.56        | 87.53           | 84.45                                                  | 97.62            |

<sup>a</sup> D: S $\gamma$  of C153; A: N $\tau$  of H180; H: H $\gamma$  of C153; X: C $\beta$  of C153. <sup>b</sup>Selected complex.

**Table S23.** Non-bond interaction energies (kcal/mol), C $\alpha$  RMSD (Å) of C153 and H180 calculated with respect to the starting position.  $\chi_1$  torsion angle of C153 (degrees) and angle values of the hydrogen bond between C153 and H180 (degrees) of the **3a**/PfGAPDH complexes obtained by Monte Carlo/Minimization procedure.

| Complex              | Binding approach | Nonbond interaction energies (kcal/mol) | RMSD (C153) | RMSD (H180) | $\chi_1$ (C153) | Angle value of the hydrogen bond between C153 and H180 |                  |
|----------------------|------------------|-----------------------------------------|-------------|-------------|-----------------|--------------------------------------------------------|------------------|
|                      |                  |                                         |             |             |                 | DHA <sup>a</sup>                                       | XDA <sup>a</sup> |
| <b>1<sup>b</sup></b> | BA1              | -7.548                                  | 0.29        | 0.50        | -67.97          | 114.51                                                 | 132.53           |
| <b>2</b>             | BA1              | -1.630                                  | 0.38        | 0.54        | -64.30          | 102.85                                                 | 102.43           |
| <b>3</b>             | BA1              | 8.123                                   | 1.05        | 0.59        | -62.61          | 124.13                                                 | 77.21            |
| <b>4</b>             | BA1              | -0.096                                  | 3.27        | 0.57        | -57.42          | 132.03                                                 | 67.75            |
| <b>5</b>             | BA1              | 3.763                                   | 2.94        | 0.52        | -59.42          | 130.96                                                 | 70.23            |
| <b>6</b>             | BA1              | 43.707                                  | 5.51        | 0.95        | 69.97           | 143.27                                                 | 66.76            |
| <b>7<sup>b</sup></b> | BA2              | -8.943                                  | 0.15        | 0.55        | -61.13          | 110.89                                                 | 131.72           |
| <b>8</b>             | BA2              | -3.476                                  | 0.85        | 0.54        | -95.77          | 127.36                                                 | 91.87            |
| <b>9</b>             | BA2              | -2.418                                  | 1.07        | 0.53        | -80.34          | 121.48                                                 | 84.06            |
| <b>10</b>            | BA2              | 21.830                                  | 2.04        | 0.40        | -49.19          | 132.99                                                 | 64.39            |
| <b>11</b>            | BA2              | 20.578                                  | 1.91        | 0.58        | -25.09          | 159.16                                                 | 86.19            |
| <b>12</b>            | BA2              | 65.453                                  | 5.00        | 1.13        | 62.44           | 124.73                                                 | 59.36            |
| <b>13</b>            | BA2              | 57.282                                  | 5.61        | 1.80        | 59.74           | 142.64                                                 | 91.85            |
| <b>14</b>            | BA2              | -4.548                                  | 5.65        | 1.98        | 75.59           | 146.11                                                 | 91.45            |

<sup>a</sup> D: S $_{\gamma}$  of C153; A: N $_{\tau}$  of H180; H: H $_{\gamma}$  of C153; X: C $\beta$  of C153. <sup>b</sup>Selected complex.

**Table S24.** Non-bond interaction energies (kcal/mol), C $\alpha$  RMSD (Å) of C153 and H180 calculated with respect to the starting position.  $\chi_1$  torsion angle of C153 (degrees) and angle values of the hydrogen bond between C153 and H180 (degrees) of the **3b**/PfGAPDH complexes obtained by Monte Carlo/Minimization procedure.

| Complex               | Binding approach | Nonbond interaction energies (kcal/mol) | RMSD (C153) | RMSD (H180) | $\chi_1$ (C153) | Angle value of the hydrogen bond between C153 and H180 |                  |
|-----------------------|------------------|-----------------------------------------|-------------|-------------|-----------------|--------------------------------------------------------|------------------|
|                       |                  |                                         |             |             |                 | DHA <sup>a</sup>                                       | XDA <sup>a</sup> |
| <b>1</b> <sup>b</sup> | BA1              | -8.083                                  | 0.24        | 0.52        | -60.68          | 111.09                                                 | 133.00           |
| <b>2</b>              | BA1              | -0.558                                  | 0.63        | 0.47        | -68.85          | 140.51                                                 | 71.77            |
| <b>3</b>              | BA1              | -0.526                                  | 0.88        | 0.47        | -70.07          | 128.52                                                 | 71.76            |
| <b>4</b>              | BA1              | 0.225                                   | 1.10        | 0.45        | -85.75          | 133.74                                                 | 66.31            |
| <b>5</b>              | BA1              | 1.173                                   | 1.30        | 0.41        | -90.55          | 133.66                                                 | 66.61            |
| <b>6</b>              | BA1              | 29.900                                  | 4.59        | 0.90        | 78.83           | 129.83                                                 | 65.49            |
| <b>7</b>              | BA1              | 36.515                                  | 5.56        | 1.25        | 70.78           | 148.90                                                 | 68.16            |
| <b>8</b> <sup>b</sup> | BA2              | -6.955                                  | 0.13        | 0.48        | -62.85          | 113.08                                                 | 132.95           |
| <b>9</b>              | BA2              | 0.974                                   | 0.37        | 0.49        | -69.05          | 139.27                                                 | 86.60            |
| <b>10</b>             | BA2              | 1.253                                   | 1.52        | 0.38        | -111.84         | 132.92                                                 | 66.31            |
| <b>11</b>             | BA2              | 1.591                                   | 1.90        | 0.38        | -81.44          | 133.04                                                 | 64.63            |
| <b>12</b>             | BA2              | 1.498                                   | 1.89        | 0.37        | -72.64          | 135.22                                                 | 66.03            |
| <b>13</b>             | BA2              | 62.130                                  | 4.94        | 0.89        | 26.06           | 136.89                                                 | 61.01            |

<sup>a</sup> D: S $_{\gamma}$  of C153; A: N $_{\tau}$  of H180; H: H $_{\gamma}$  of C153; X: C $\beta$  of C153. <sup>b</sup>Selected complex.

**Table S25.** Non-bond interaction energies (kcal/mol), C $\alpha$  RMSD (Å) of C153 and H180 calculated with respect to the starting position.  $\chi_1$  torsion angle of C153 (degrees) and angle values of the hydrogen bond between C153 and H180 (degrees) of the **3c**/PfGAPDH complexes obtained by Monte Carlo/Minimization procedure.

| Complex              | Binding approach | Nonbond interaction energies (kcal/mol) | RMSD (C153) | RMSD (H180) | $\chi_1$ (C153) | Angle value of the hydrogen bond between C153 and H180 |                  |
|----------------------|------------------|-----------------------------------------|-------------|-------------|-----------------|--------------------------------------------------------|------------------|
|                      |                  |                                         |             |             |                 | DHA <sup>a</sup>                                       | XDA <sup>a</sup> |
| <b>1<sup>b</sup></b> | BA1              | -11.956                                 | 0.24        | 0.46        | -66.78          | 103.72                                                 | 136.77           |
| <b>2</b>             | BA1              | 0.996                                   | 1.39        | 0.41        | -85.51          | 129.86                                                 | 70.54            |
| <b>3</b>             | BA1              | -3.224                                  | 1.51        | 0.41        | -71.88          | 132.36                                                 | 63.85            |
| <b>4</b>             | BA1              | 29.703                                  | 1.51        | 0.47        | -56.12          | 135.55                                                 | 74.01            |
| <b>5</b>             | BA1              | 38.053                                  | 1.29        | 0.57        | -38.40          | 117.06                                                 | 89.62            |
| <b>6</b>             | BA1              | 30.459                                  | 5.13        | 1.31        | 98.11           | 74.23                                                  | 82.45            |
| <b>7</b>             | BA1              | 53.717                                  | 5.86        | 1.74        | 112.96          | 80.81                                                  | 73.87            |
| <b>8</b>             | BA1              | 65.850                                  | 6.00        | 1.63        | 102.52          | 77.31                                                  | 77.33            |
| <b>9<sup>b</sup></b> | BA2              | -10.615                                 | 0.24        | 0.58        | -60.98          | 111.57                                                 | 134.81           |
| <b>10</b>            | BA2              | 5.234                                   | 0.89        | 1.05        | -98.93          | 135.11                                                 | 79.96            |
| <b>11</b>            | BA2              | 23.086                                  | 0.33        | 0.82        | -80.92          | 127.01                                                 | 106.79           |
| <b>12</b>            | BA2              | 10.481                                  | 0.42        | 0.89        | -56.38          | 111.45                                                 | 109.75           |
| <b>13</b>            | BA2              | 22.524                                  | 0.49        | 0.80        | -83.60          | 132.03                                                 | 114.42           |
| <b>14</b>            | BA2              | 17.192                                  | 5.31        | 1.17        | 87.69           | 110.85                                                 | 69.75            |
| <b>15</b>            | BA2              | 19.364                                  | 5.63        | 1.28        | 74.89           | 109.19                                                 | 67.83            |
| <b>16</b>            | BA2              | 13.948                                  | 5.90        | 1.39        | 69.12           | 134.83                                                 | 63.66            |

<sup>a</sup> D: S $\gamma$  of C153; A: N $\tau$  of H180; H: H $\gamma$  of C153; X: C $\beta$  of C153. <sup>b</sup>Selected complex.

**Table S26.** Non-bond interaction energies (kcal/mol), C $\alpha$  RMSD (Å) of C153 and H180 calculated with respect to the starting position.  $\chi_1$  torsion angle of C153 (degrees) and angle values of the hydrogen bond between C153 and H180 (degrees) of the **3d**/PfGAPDH complexes obtained by Monte Carlo/Minimization procedure.

| Complex              | Binding approach | Nonbond interaction energies (kcal/mol) | RMSD (C153) | RMSD (H180) | $\chi_1$ (C153) | Angle value of the hydrogen bond between C153 and H180 |                  |
|----------------------|------------------|-----------------------------------------|-------------|-------------|-----------------|--------------------------------------------------------|------------------|
|                      |                  |                                         |             |             |                 | DHA <sup>a</sup>                                       | XDA <sup>a</sup> |
| <b>1<sup>b</sup></b> | BA1              | -9.268                                  | 0.15        | 0.61        | -62.84          | 115.65                                                 | 139.87           |
| <b>2</b>             | BA1              | -1.073                                  | 0.21        | 0.58        | -75.02          | 123.19                                                 | 96.00            |
| <b>3</b>             | BA1              | -6.940                                  | 1.36        | 0.52        | -69.37          | 122.49                                                 | 78.16            |
| <b>4</b>             | BA1              | 21.722                                  | 3.31        | 0.63        | -77.28          | 149.44                                                 | 74.05            |
| <b>5</b>             | BA1              | 8.731                                   | 3.11        | 0.60        | -72.15          | 142.00                                                 | 69.76            |
| <b>6</b>             | BA1              | 39.745                                  | 5.13        | 0.97        | 74.02           | 131.98                                                 | 90.36            |
| <b>7</b>             | BA1              | 3.301                                   | 4.44        | 0.78        | 57.21           | 124.20                                                 | 113.72           |
| <b>8</b>             | BA1              | 38.717                                  | 5.11        | 1.32        | 64.48           | 128.34                                                 | 139.87           |
| <b>9<sup>b</sup></b> | BA2              | -7.732                                  | 0.27        | 0.47        | -60.21          | 110.37                                                 | 126.20           |
| <b>10</b>            | BA2              | -2.542                                  | 0.44        | 0.43        | -96.65          | 132.75                                                 | 112.43           |
| <b>11</b>            | BA2              | -4.840                                  | 1.06        | 0.44        | -68.46          | 118.23                                                 | 76.28            |
| <b>12</b>            | BA2              | 9.679                                   | 1.48        | 0.46        | -67.88          | 122.01                                                 | 72.56            |
| <b>13</b>            | BA2              | -0.422                                  | 1.29        | 0.46        | -64.36          | 130.04                                                 | 74.71            |
| <b>14</b>            | BA2              | 30.203                                  | 7.06        | 1.06        | -38.67          | 88.26                                                  | 65.49            |
| <b>15</b>            | BA2              | 54.048                                  | 6.67        | 0.97        | -56.33          | 85.89                                                  | 79.58            |

<sup>a</sup> D: S $_{\gamma}$  of C153; A: N $_{\tau}$  of H180; H: H $_{\gamma}$  of C153; X: C $\beta$  of C153. <sup>b</sup>Selected complex.

**Table S27.** Non-bond interaction energies (kcal/mol), C $\alpha$  RMSD (Å) of C153 and H180 calculated with respect to the starting position.  $\chi_1$  torsion angle of C153 (degrees) and angle values of the hydrogen bond between C153 and H180 (degrees) of the **4a**/PfGAPDH complexes obtained by Monte Carlo/Minimization procedure.

| Complex               | Binding approach | Nonbond interaction energies (kcal/mol) | RMSD (C153) | RMSD (H180) | $\chi_1$ (C153) | Angle value of the hydrogen bond between C153 and H180 |                  |
|-----------------------|------------------|-----------------------------------------|-------------|-------------|-----------------|--------------------------------------------------------|------------------|
|                       |                  |                                         |             |             |                 | DHA <sup>a</sup>                                       | XDA <sup>a</sup> |
| <b>1</b> <sup>b</sup> | BA1              | -7.193                                  | 0.30        | 0.49        | -67.75          | 118.81                                                 | 133.97           |
| <b>2</b>              | BA1              | -1.133                                  | 0.19        | 0.50        | -63.78          | 110.87                                                 | 123.77           |
| <b>3</b>              | BA1              | 7.825                                   | 1.32        | 0.45        | -150.23         | 137.88                                                 | 65.33            |
| <b>4</b>              | BA1              | 11.784                                  | 1.92        | 0.48        | -88.28          | 136.90                                                 | 65.28            |
| <b>5</b>              | BA1              | 0.382                                   | 2.19        | 0.42        | -57.18          | 115.90                                                 | 70.80            |
| <b>6</b>              | BA1              | 31.489                                  | 5.98        | 2.40        | 66.50           | 132.38                                                 | 120.08           |
| <b>7</b>              | BA1              | 27.649                                  | 6.21        | 2.27        | 87.23           | 147.46                                                 | 112.23           |
| <b>8</b> <sup>b</sup> | BA2              | -8.592                                  | 0.15        | 0.55        | -61.44          | 111.23                                                 | 131.51           |
| <b>9</b>              | BA2              | -1.674                                  | 0.80        | 0.40        | -83.05          | 138.26                                                 | 73.16            |
| <b>10</b>             | BA2              | -2.000                                  | 0.71        | 0.38        | -69.12          | 123.52                                                 | 77.95            |
| <b>11</b>             | BA2              | 8.792                                   | 1.06        | 0.40        | -96.26          | 125.25                                                 | 76.87            |
| <b>12</b>             | BA2              | 0.468                                   | 2.32        | 0.41        | -79.71          | 139.48                                                 | 69.07            |
| <b>13</b>             | BA2              | 33.031                                  | 5.01        | 0.78        | 75.50           | 135.61                                                 | 68.07            |
| <b>14</b>             | BA2              | 12.445                                  | 5.07        | 0.93        | 72.85           | 142.57                                                 | 72.40            |
| <b>15</b>             | BA2              | 8.165                                   | 5.23        | 0.73        | 79.85           | 137.32                                                 | 71.91            |

<sup>a</sup> D: S $_{\gamma}$  of C153; A: N $_{\tau}$  of H180; H: H $_{\gamma}$  of C153; X: C $\beta$  of C153. <sup>b</sup>Selected complex.

**Table S28.** Non-bond interaction energies (kcal/mol), C $\alpha$  RMSD (Å) of C153 and H180 calculated with respect to the starting position.  $\chi_1$  torsion angle of C153 (degrees) and angle values of the hydrogen bond between C153 and H180 (degrees) of the **4b**/PfGAPDH complexes obtained by Monte Carlo/Minimization procedure.

| Complex              | Binding approach | Nonbond interaction energies (kcal/mol) | RMSD (C153) | RMSD (H180) | $\chi_1$ (C153) | Angle value of the hydrogen bond between C153 and H180 |                  |
|----------------------|------------------|-----------------------------------------|-------------|-------------|-----------------|--------------------------------------------------------|------------------|
|                      |                  |                                         |             |             |                 | DHA <sup>a</sup>                                       | XDA <sup>a</sup> |
| <b>1<sup>b</sup></b> | BA1              | -9.210                                  | 0.24        | 0.52        | -60.716         | 109.973                                                | 133.558          |
| <b>2</b>             | BA1              | 1.238                                   | 0.32        | 0.51        | -59.441         | 117.474                                                | 133.722          |
| <b>3</b>             | BA1              | 2.808                                   | 0.44        | 0.48        | -71.937         | 130.285                                                | 86.974           |
| <b>4</b>             | BA1              | -1.802                                  | 1.22        | 0.45        | -70.121         | 132.247                                                | 71.701           |
| <b>5</b>             | BA1              | -1.053                                  | 2.42        | 0.43        | -68.219         | 126.322                                                | 74.058           |
| <b>6</b>             | BA1              | 54.368                                  | 5.89        | 1.54        | 42.036          | 129.141                                                | 54.820           |
| <b>7<sup>b</sup></b> | BA2              | -8.829                                  | 0.15        | 0.48        | -61.117         | 113.253                                                | 134.609          |
| <b>8</b>             | BA2              | 6.424                                   | 0.21        | 0.63        | -50.689         | 96.497                                                 | 140.972          |
| <b>9</b>             | BA2              | -5.552                                  | 1.12        | 0.58        | -70.661         | 121.288                                                | 75.045           |
| <b>10</b>            | BA2              | 14.907                                  | 1.98        | 0.54        | -65.283         | 102.210                                                | 85.612           |
| <b>11</b>            | BA2              | 12.699                                  | 2.63        | 0.36        | -171.189        | 134.414                                                | 66.610           |

<sup>a</sup> D: S $\gamma$  of C153; A: N $\tau$  of H180; H: H $\gamma$  of C153; X: C $\beta$  of C153. <sup>b</sup>Selected complex.

**Table S29.** Non-bond interaction energies (kcal/mol), C $\alpha$  RMSD (Å) of C153 and H180 calculated with respect to the starting position.  $\chi_1$  torsion angle of C153 (degrees) and angle values of the hydrogen bond between C153 and H180 (degrees) of the **4c**/PfGAPDH complexes obtained by Monte Carlo/Minimization procedure.

| Complex              | Binding approach | Nonbond interaction energies (kcal/mol) | RMSD (C153) | RMSD (H180) | $\chi_1$ (C153) | Angle value of the hydrogen bond between C153 and H180 |                  |
|----------------------|------------------|-----------------------------------------|-------------|-------------|-----------------|--------------------------------------------------------|------------------|
|                      |                  |                                         |             |             |                 | DHA <sup>a</sup>                                       | XDA <sup>a</sup> |
| <b>1<sup>b</sup></b> | BA1              | -11.308                                 | 0.24        | 0.46        | -68.298         | 106.515                                                | 135.050          |
| <b>2</b>             | BA1              | 6.045                                   | 0.73        | 0.47        | -79.674         | 134.533                                                | 83.225           |
| <b>3</b>             | BA1              | -7.754                                  | 0.79        | 0.46        | -83.562         | 145.409                                                | 80.635           |
| <b>4</b>             | BA1              | 43.389                                  | 2.16        | 0.42        | -91.101         | 129.520                                                | 78.582           |
| <b>5</b>             | BA1              | -7.423                                  | 2.78        | 0.41        | -64.444         | 122.684                                                | 75.675           |
| <b>6<sup>b</sup></b> | BA2              | -10.031                                 | 0.23        | 0.58        | -60.636         | 111.693                                                | 135.004          |
| <b>7</b>             | BA2              | 6.583                                   | 1.62        | 0.51        | -84.190         | 129.563                                                | 65.748           |
| <b>8</b>             | BA2              | 33.100                                  | 1.16        | 0.55        | -67.865         | 144.767                                                | 84.095           |
| <b>9</b>             | BA2              | -2.830                                  | 3.18        | 0.55        | -66.556         | 142.478                                                | 71.062           |
| <b>10</b>            | BA2              | 12.445                                  | 2.98        | 0.63        | -51.666         | 90.754                                                 | 100.242          |
| <b>11</b>            | BA2              | 39.554                                  | 5.15        | 1.12        | 72.671          | 141.922                                                | 68.779           |
| <b>12</b>            | BA2              | 39.481                                  | 6.02        | 1.30        | 68.903          | 136.415                                                | 68.834           |
| <b>13</b>            | BA2              | 26.735                                  | 6.25        | 1.29        | 66.143          | 124.229                                                | 66.560           |

<sup>a</sup> D: S $_{\gamma}$  of C153; A: N $_{\tau}$  of H180; H: H $_{\gamma}$  of C153; X: C $\beta$  of C153. <sup>b</sup>Selected complex.



**Table S30.** Non-bond interaction energies (kcal/mol), C $\alpha$  RMSD (Å) of C153 and H180 calculated with respect to the starting position.  $\chi_1$  torsion angle of C153 (degrees) and angle values of the hydrogen bond between C153 and H180 (degrees) of the **4d**/PfGAPDH complexes obtained by Monte Carlo/Minimization procedure.

| Complex              | Binding approach | Nonbond interaction energies (kcal/mol) | RMSD (C153) | RMSD (H180) | $\chi_1$ (C153) | Angle value of the hydrogen bond between C153 and H180 |                  |
|----------------------|------------------|-----------------------------------------|-------------|-------------|-----------------|--------------------------------------------------------|------------------|
|                      |                  |                                         |             |             |                 | DHA <sup>a</sup>                                       | XDA <sup>a</sup> |
| <b>1<sup>b</sup></b> | BA1              | -10.135                                 | 0.15        | 0.62        | -62.88          | 114.49                                                 | 127.58           |
| <b>2</b>             | BA1              | -3.974                                  | 0.59        | 0.48        | -75.60          | 128.80                                                 | 85.74            |
| <b>3</b>             | BA1              | 1.163                                   | 1.65        | 0.40        | -71.08          | 135.36                                                 | 66.17            |
| <b>4</b>             | BA1              | 0.991                                   | 1.89        | 0.42        | -68.27          | 135.55                                                 | 66.47            |
| <b>5</b>             | BA1              | 3.749                                   | 3.41        | 1.04        | -58.46          | 138.77                                                 | 67.58            |
| <b>6</b>             | BA1              | 51.161                                  | 5.17        | 1.01        | 68.45           | 145.98                                                 | 71.16            |
| <b>7</b>             | BA1              | 55.187                                  | 5.39        | 1.02        | 63.48           | 149.66                                                 | 74.46            |
| <b>8</b>             | BA1              | 35.102                                  | 4.90        | 1.02        | 63.19           | 154.24                                                 | 78.57            |
| <b>9<sup>b</sup></b> | BA2              | -8.962                                  | 0.22        | 0.48        | -60.42          | 110.96                                                 | 137.97           |
| <b>10</b>            | BA2              | 14.339                                  | 1.15        | 0.51        | -77.00          | 104.35                                                 | 89.18            |
| <b>11</b>            | BA2              | -5.076                                  | 0.55        | 0.53        | -65.64          | 106.85                                                 | 108.32           |
| <b>12</b>            | BA2              | -0.527                                  | 1.10        | 0.49        | -66.78          | 130.14                                                 | 72.22            |
| <b>13</b>            | BA2              | -2.602                                  | 2.15        | 0.71        | -166.12         | 132.32                                                 | 61.09            |
| <b>14</b>            | BA2              | 35.708                                  | 5.18        | 0.97        | 72.35           | 101.84                                                 | 77.96            |
| <b>15</b>            | BA2              | -3.830                                  | 5.31        | 1.50        | 60.05           | 133.06                                                 | 82.38            |
| <b>16</b>            | BA2              | 26.130                                  | 5.82        | 0.95        | 69.20           | 111.57                                                 | 83.88            |

<sup>a</sup> D: S $_{\gamma}$  of C153; A: N $_{\tau}$  of H180; H: H $_{\gamma}$  of C153; X: C $\beta$  of C153. <sup>b</sup>Selected complex.

**Table S31.** Non-bond interaction energies (kcal/mol), C $\alpha$  RMSD (Å) of C153 and H180 calculated with respect to the starting position,  $\chi_1$  torsion angle of C153(degrees), and angles of the hydrogen bond between C153 and H180 (degrees) of the best docked complexes after unrestrained structure optimization.

| Lig.      | Binding approach | Nonbond interaction energies (kcal/mol) | RMSD (C153) | RMSD (H180) | $\chi_1$ (C153) | Angle DHA <sup>a</sup> | Angle XDA <sup>a</sup> |
|-----------|------------------|-----------------------------------------|-------------|-------------|-----------------|------------------------|------------------------|
| <b>1a</b> | BA1              | -22.590                                 | 0.52        | 0.74        | -73.73          | 124.17                 | 129.23                 |
|           | BA2              | -13.343                                 | 0.62        | 0.65        | -68.64          | 115.89                 | 125.47                 |
| <b>1b</b> | BA1              | -17.717                                 | 0.47        | 0.86        | -70.70          | 115.94                 | 135.20                 |
|           | BA2              | -16.548                                 | 0.65        | 0.79        | -74.40          | 116.61                 | 131.37                 |
| <b>1c</b> | BA1              | -19.845                                 | 0.51        | 0.66        | -73.77          | 113.02                 | 133.38                 |
|           | BA2              | -16.387                                 | 0.52        | 0.71        | -73.81          | 117.95                 | 130.53                 |
| <b>1d</b> | BA1              | -18.308                                 | 0.16        | 0.18        | -72.34          | 120.56                 | 131.82                 |
|           | BA2              | -16.774                                 | 0.61        | 0.78        | -75.43          | 119.16                 | 131.23                 |
| <b>2a</b> | BA1              | -17.205                                 | 0.37        | 0.81        | -70.65          | 125.10                 | 133.32                 |
|           | BA2              | -11.536                                 | 0.53        | 0.24        | -71.44          | 113.63                 | 128.58                 |
| <b>2b</b> | BA1              | -17.427                                 | 0.66        | 0.79        | -72.33          | 104.17                 | 130.40                 |
|           | BA2              | -13.269                                 | 0.76        | 0.60        | -76.07          | 118.43                 | 127.47                 |
| <b>2c</b> | BA1              | -13.921                                 | 0.56        | 0.95        | -66.98          | 128.46                 | 132.79                 |
|           | BA2              | -10.281                                 | 0.49        | 0.46        | -68.15          | 128.04                 | 129.50                 |
| <b>2d</b> | BA1              | -14.750                                 | 0.46        | 0.76        | -67.34          | 109.79                 | 129.42                 |
|           | BA2              | -6.510                                  | 0.67        | 0.85        | -69.67          | 117.43                 | 133.81                 |
| <b>3a</b> | BA1              | -18.374                                 | 0.48        | 0.76        | -71.37          | 122.78                 | 130.26                 |
|           | BA2              | -16.607                                 | 0.65        | 0.54        | -72.08          | 116.39                 | 130.52                 |
| <b>3b</b> | BA1              | -19.049                                 | 0.41        | 0.67        | -65.87          | 116.90                 | 137.39                 |
|           | BA2              | -14.111                                 | 0.55        | 0.42        | -74.55          | 120.22                 | 128.86                 |
| <b>3c</b> | BA1              | -21.182                                 | 0.53        | 0.96        | -64.38          | 121.32                 | 130.60                 |
|           | BA2              | -13.996                                 | 0.60        | 0.67        | -69.63          | 123.43                 | 129.39                 |
| <b>3d</b> | BA1              | -24.553                                 | 0.51        | 1.06        | -69.32          | 119.37                 | 131.37                 |
|           | BA2              | -11.600                                 | 0.47        | 0.72        | -70.48          | 124.35                 | 131.32                 |
| <b>4a</b> | BA1              | -22.191                                 | 0.48        | 0.83        | -71.71          | 122.05                 | 134.89                 |
|           | BA2              | -17.572                                 | 0.43        | 0.56        | -72.41          | 119.55                 | 130.34                 |
| <b>4b</b> | BA1              | -23.495                                 | 0.30        | 0.51        | -66.11          | 111.60                 | 133.22                 |
|           | BA2              | -17.404                                 | 0.55        | 0.53        | -71.56          | 121.53                 | 124.83                 |
| <b>4c</b> | BA1              | -22.441                                 | 0.40        | 0.92        | -65.50          | 125.77                 | 129.05                 |
|           | BA2              | -14.363                                 | 0.70        | 0.49        | -69.16          | 121.15                 | 130.51                 |
| <b>4d</b> | BA1              | -24.176                                 | 0.31        | 0.76        | -70.83          | 116.59                 | 133.40                 |
|           | BA2              | -11.351                                 | 0.51        | 0.67        | -71.98          | 120.05                 | 131.71                 |

<sup>a</sup> D: S $_{\gamma}$  of C153; A: N $_{\tau}$  of H180; H: H $_{\gamma}$  of C153; X: C $\beta$  of C153.

**Table S32.** Summary of Procheck results obtained for the selected docked complexes.

| Structure          | Binding Approach | Residues favored regions (%) | Residues allowed regions (%) | Residues generously allowed regions (%) | Residues disallowed regions (%) | Poor rotamer (%) |
|--------------------|------------------|------------------------------|------------------------------|-----------------------------------------|---------------------------------|------------------|
| <b>1YWG</b>        | -                | 85.2                         | 14.0                         | 0.8                                     | 0.0                             | 1.1              |
| <b>1a</b> /PfGAPDH | BA1              | 83.1                         | 15.7                         | 0.7                                     | 0.5                             | 0.9              |
| <b>1a</b> /PfGAPDH | BA2              | 83.3                         | 15.4                         | 0.9                                     | 0.4                             | 0.9              |
| <b>1b</b> /PfGAPDH | BA1              | 83.1                         | 15.6                         | 0.9                                     | 0.4                             | 0.9              |
| <b>1b</b> /PfGAPDH | BA2              | 82.9                         | 16.3                         | 0.6                                     | 0.3                             | 1.5              |
| <b>1c</b> /PfGAPDH | BA1              | 83.0                         | 15.7                         | 0.9                                     | 0.4                             | 0.9              |
| <b>1c</b> /PfGAPDH | BA2              | 81.9                         | 17.1                         | 0.6                                     | 0.3                             | 0.9              |
| <b>1d</b> /PfGAPDH | BA1              | 83.2                         | 15.6                         | 0.7                                     | 0.5                             | 0.9              |
| <b>1d</b> /PfGAPDH | BA2              | 82.3                         | 16.8                         | 0.7                                     | 0.3                             | 1.2              |
| <b>2a</b> /PfGAPDH | BA1              | 83.2                         | 15.3                         | 0.9                                     | 0.5                             | 0.9              |
| <b>2a</b> /PfGAPDH | BA2              | 83.3                         | 15.4                         | 0.9                                     | 0.4                             | 0.9              |
| <b>2b</b> /PfGAPDH | BA1              | 83.0                         | 15.8                         | 0.8                                     | 0.4                             | 0.9              |
| <b>2b</b> /PfGAPDH | BA2              | 83.1                         | 15.6                         | 0.9                                     | 0.4                             | 0.9              |
| <b>2c</b> /PfGAPDH | BA1              | 82.9                         | 15.9                         | 0.7                                     | 0.5                             | 0.9              |
| <b>2c</b> /PfGAPDH | BA2              | 83.1                         | 15.6                         | 0.9                                     | 0.4                             | 0.9              |
| <b>2d</b> /PfGAPDH | BA1              | 83.3                         | 15.3                         | 0.9                                     | 0.4                             | 0.9              |
| <b>2d</b> /PfGAPDH | BA2              | 83.1                         | 15.5                         | 1.0                                     | 0.3                             | 0.9              |
| <b>3a</b> /PfGAPDH | BA1              | 83.4                         | 15.2                         | 0.9                                     | 0.4                             | 0.9              |
| <b>3a</b> /PfGAPDH | BA2              | 83.4                         | 15.2                         | 0.9                                     | 0.5                             | 0.9              |
| <b>3b</b> /PfGAPDH | BA1              | 83.0                         | 15.8                         | 0.7                                     | 0.5                             | 0.9              |
| <b>3b</b> /PfGAPDH | BA2              | 82.3                         | 16.7                         | 0.8                                     | 0.3                             | 1.1              |
| <b>3c</b> /PfGAPDH | BA1              | 83.3                         | 15.3                         | 0.9                                     | 0.4                             | 0.9              |
| <b>3c</b> /PfGAPDH | BA2              | 83.2                         | 15.4                         | 0.9                                     | 0.5                             | 0.9              |
| <b>3d</b> /PfGAPDH | BA1              | 83.1                         | 15.6                         | 0.8                                     | 0.5                             | 0.9              |
| <b>3d</b> /PfGAPDH | BA2              | 83.4                         | 15.3                         | 0.9                                     | 0.4                             | 0.9              |
| <b>4a</b> /PfGAPDH | BA1              | 83.4                         | 15.3                         | 0.8                                     | 0.5                             | 0.9              |
| <b>4a</b> /PfGAPDH | BA2              | 83.3                         | 15.2                         | 1.1                                     | 0.4                             | 0.9              |
| <b>4b</b> /PfGAPDH | BA1              | 83.1                         | 15.6                         | 0.8                                     | 0.5                             | 0.9              |
| <b>4b</b> /PfGAPDH | BA2              | 83.3                         | 15.4                         | 0.8                                     | 0.5                             | 0.9              |
| <b>4c</b> /PfGAPDH | BA1              | 83.6                         | 15.0                         | 0.9                                     | 0.5                             | 0.9              |
| <b>4c</b> /PfGAPDH | BA2              | 83.0                         | 15.7                         | 0.9                                     | 0.4                             | 0.9              |
| <b>4d</b> /PfGAPDH | BA1              | 83.0                         | 15.7                         | 0.9                                     | 0.4                             | 0.9              |
| <b>4d</b> /PfGAPDH | BA2              | 83.5                         | 15.2                         | 0.8                                     | 0.6                             | 0.9              |

**Table S33.** Calculated RMSD (Å) of the ligand conformation in the docked complexes with respect to the conformers obtained by the conformational analysis. The energy difference ( $\Delta E$ ) from the global minimum energy conformer (GM) is also reported.

| Compound  | Binding Approach | RMSD (Å) | $\Delta E_{GM}$ (kcal/mol) |
|-----------|------------------|----------|----------------------------|
| <b>1a</b> | BA1              | 0.52     | 0                          |
| <b>1a</b> | BA2              | 0.45     | 0                          |
| <b>1b</b> | BA1              | 0.36     | 1.92                       |
| <b>1b</b> | BA2              | 0.39     | 1.92                       |
| <b>1c</b> | BA1              | 0.48     | 1.92                       |
| <b>1c</b> | BA2              | 0.49     | 1.92                       |
| <b>1d</b> | BA1              | 0.19     | 1.51                       |
| <b>1d</b> | BA2              | 0.68     | 0                          |
| <b>2a</b> | BA1              | 0.16     | 1.09                       |
| <b>2a</b> | BA2              | 0.30     | 1.09                       |
| <b>2b</b> | BA1              | 0.18     | 1.53                       |
| <b>2b</b> | BA2              | 0.70     | 0.26                       |
| <b>2c</b> | BA1              | 0.49     | 1.53                       |
| <b>2c</b> | BA2              | 0.28     | 1.53                       |
| <b>2d</b> | BA1              | 0.47     | 1.25                       |
| <b>2d</b> | BA2              | 0.30     | 1.09                       |
| <b>3a</b> | BA1              | 0.28     | 0.08                       |
| <b>3a</b> | BA2              | 0.39     | 0.51                       |
| <b>3b</b> | BA1              | 0.48     | 1.77                       |
| <b>3b</b> | BA2              | 0.68     | 0.86                       |
| <b>3c</b> | BA1              | 0.29     | 0.81                       |
| <b>3c</b> | BA2              | 0.27     | 0.81                       |
| <b>3d</b> | BA1              | 0.23     | 0.26                       |
| <b>3d</b> | BA2              | 0.22     | 0                          |
| <b>4a</b> | BA1              | 0.28     | 0.47                       |
| <b>4a</b> | BA2              | 0.44     | 0.31                       |
| <b>4b</b> | BA1              | 0.49     | 1.85                       |
| <b>4b</b> | BA2              | 0.19     | 2.20                       |
| <b>4c</b> | BA1              | 1.01     | 15.9                       |
| <b>4c</b> | BA2              | 0.93     | 16.6                       |
| <b>4d</b> | BA1              | 0.28     | 0.73                       |
| <b>4d</b> | BA2              | 0.26     | 0.47                       |

**Table S34.** Solvent accessible surface area (SASA) of bromine for the selected docked complexes.

| Structure          | Binding Approach | SASA (Å <sup>2</sup> ) |
|--------------------|------------------|------------------------|
| <b>1a</b> /PfGAPDH | BA1              | 9.420                  |
| <b>1a</b> /PfGAPDH | BA2              | 20.999                 |
| <b>1b</b> /PfGAPDH | BA1              | 14.658                 |
| <b>1b</b> /PfGAPDH | BA2              | 0                      |
| <b>1c</b> /PfGAPDH | BA1              | 5.332                  |
| <b>1c</b> /PfGAPDH | BA2              | 7.356                  |
| <b>1d</b> /PfGAPDH | BA1              | 0                      |
| <b>1d</b> /PfGAPDH | BA2              | 8.651                  |
| <b>2a</b> /PfGAPDH | BA1              | 5.739                  |
| <b>2a</b> /PfGAPDH | BA2              | 26.358                 |
| <b>2b</b> /PfGAPDH | BA1              | 13.929                 |
| <b>2b</b> /PfGAPDH | BA2              | 23.373                 |
| <b>2c</b> /PfGAPDH | BA1              | 0                      |
| <b>2c</b> /PfGAPDH | BA2              | 18.548                 |
| <b>2d</b> /PfGAPDH | BA1              | 5.224                  |
| <b>2d</b> /PfGAPDH | BA2              | 16.811                 |
| <b>3a</b> /PfGAPDH | BA1              | 5.559                  |
| <b>3a</b> /PfGAPDH | BA2              | 26.382                 |
| <b>3b</b> /PfGAPDH | BA1              | 0                      |
| <b>3b</b> /PfGAPDH | BA2              | 20.629                 |
| <b>3c</b> /PfGAPDH | BA1              | 0                      |
| <b>3c</b> /PfGAPDH | BA2              | 1.808                  |
| <b>3d</b> /PfGAPDH | BA1              | 3.003                  |
| <b>3d</b> /PfGAPDH | BA2              | 6.644                  |
| <b>4a</b> /PfGAPDH | BA1              | 0                      |
| <b>4a</b> /PfGAPDH | BA2              | 25.938                 |
| <b>4b</b> /PfGAPDH | BA1              | 0                      |
| <b>4b</b> /PfGAPDH | BA2              | 11.372                 |
| <b>4c</b> /PfGAPDH | BA1              | 0                      |
| <b>4c</b> /PfGAPDH | BA2              | 8.143                  |
| <b>4d</b> /PfGAPDH | BA1              | 0                      |
| <b>4d</b> /PfGAPDH | BA2              | 7.921                  |

**Table S35.** Ligand-residue interactions of the *Pf*GAPDH/**1a**, *Pf*GAPDH/**1b**, *Pf*GAPDH/**1c**, and *Pf*GAPDH/**1d** docked complexes.

| Cmpd      | Binding approach | Ligand Group/Function     | <i>Pf</i> GAPDH interacting residue | Substructure        | Interaction type |
|-----------|------------------|---------------------------|-------------------------------------|---------------------|------------------|
| <b>1a</b> | BA1              | Carboxylic                | R237                                | S11                 | Ionic            |
|           |                  |                           | T183                                | S-loop              | Hydrogen bond    |
|           |                  |                           | N185                                | S-loop              | Hydrogen bond    |
|           |                  | Amine                     | D198                                | S-loop              | Ionic            |
|           |                  |                           | S213                                | Active-site segment | Hydrogen bond    |
|           |                  | 4,5-dihydroisoxazole ring | A212                                | Active-site segment | Alkyl            |
|           |                  |                           | A235                                | S11                 | Alkyl            |
| <b>1a</b> | BA2              | Carboxylic                | N185                                | S-loop              | Hydrogen bond    |
|           |                  |                           | NAD (H <sub>2</sub> O)              | -                   | Hydrogen bond    |
|           |                  | Amine                     | NAD (H <sub>2</sub> O)              | S9-H4-loop          | Hydrogen bond    |
|           |                  |                           | C153                                | S9-H4-loop          | Alkyl            |
|           |                  | 4,5-dihydroisoxazole ring | H180                                | S10                 | $\pi$ -alkyl     |
|           |                  |                           | NAD                                 | -                   | $\pi$ -alkyl     |
|           |                  |                           |                                     |                     |                  |
| <b>1b</b> | BA1              | Carboxylic                | T214                                | Active-site segment | Hydrogen bond    |
|           |                  |                           | R237                                | S11                 | Ionic            |
|           |                  | Amine                     | H180                                | S10                 | Cation- $\pi$    |
|           |                  | 4,5-dihydroisoxazole ring | NAD                                 | -                   | $\pi$ -alkyl     |
|           |                  |                           |                                     |                     |                  |
| <b>1b</b> | BA2              | Carboxylic                | N185                                | S-loop              | Hydrogen bond    |
|           |                  |                           | T214 (H <sub>2</sub> O)             | Active-site segment | Hydrogen bond    |
|           |                  |                           | R237                                | S11                 | Ionic            |
|           |                  | Amine                     | T183                                | S-loop              | Hydrogen bond    |
|           |                  |                           | NAD (H <sub>2</sub> O)              | -                   | Hydrogen bond    |
|           |                  | 4,5-dihydroisoxazole ring | C153                                | S9-H4-loop          | Alkyl            |
|           |                  |                           | H180                                | S10                 | $\pi$ -alkyl     |
|           |                  |                           |                                     |                     |                  |
| <b>1c</b> | BA1              | Carboxylic                | R237                                | S11                 | Ionic            |
|           |                  |                           | T214                                | Active-site segment | Hydrogen bond    |
|           |                  | Amine                     | T183                                | S-loop              | Hydrogen bond    |
|           |                  |                           | H180                                | S10                 | Cation- $\pi$    |
|           |                  | 4,5-dihydroisoxazole ring | NAD                                 | -                   | $\pi$ -alkyl     |
| <b>1c</b> | BA2              | Carboxylic                | R237                                | S11                 | Ionic            |
|           |                  |                           | N185                                | S-loop              | Hydrogen bond    |
|           |                  |                           | NAD (H <sub>2</sub> O)              | -                   | Hydrogen bond    |
|           |                  | Amine                     | T183                                | S-loop              | Hydrogen bond    |
|           |                  |                           | NAD (H <sub>2</sub> O)              | -                   | Hydrogen bond    |
|           |                  | 4,5-dihydroisoxazole ring | C153                                | S9-H4-loop          | Alkyl            |
|           |                  |                           | H180                                | S10                 | $\pi$ -alkyl     |
|           |                  |                           |                                     |                     |                  |
| <b>1d</b> | BA1              | Carboxylic                | R237                                | S11                 | Ionic            |
|           |                  |                           | N185                                | S-loop              | Hydrogen bond    |
|           |                  | Amine                     | T183                                | S-loop              | Hydrogen bond    |
|           |                  | 4,5-dihydroisoxazole ring | NAD                                 | -                   | $\pi$ -alkyl     |
| <b>1d</b> | BA2              | Carboxylic                | T214                                | Active-site segment | Hydrogen bond    |
|           |                  |                           | R237                                | S11                 | Ionic            |
|           |                  | Amine                     | NAD (H <sub>2</sub> O)              | -                   | Hydrogen bond    |
|           |                  |                           | C153                                | S9-H4-loop          | Alkyl            |
|           |                  | 4,5-dihydroisoxazole ring | H180                                | S10                 | $\pi$ -alkyl     |

**Table S36.** Ligand-residue interactions of the *Pf*GAPDH/**2a**, *Pf*GAPDH/**2b**, *Pf*GAPDH/**2c**, and *Pf*GAPDH/**2d** docked complexes.

| Cmpd      | Binding approach | Ligand Group/Function     | <i>Pf</i> GAPDH interacting residue | Substructure        | Interaction type |
|-----------|------------------|---------------------------|-------------------------------------|---------------------|------------------|
| <b>2a</b> | BA1              | Ester                     | T214                                | Active-site segment | CHO bond         |
|           |                  | Amine                     | T214                                | Active-site segment | Hydrogen bond    |
|           |                  |                           | S152                                | S9-H4-loop          | Hydrogen bond    |
|           |                  | 4,5-dihydroisoxazole ring | C153                                | S9-H4-loop          | Alkyl            |
|           |                  |                           | H180                                | S10                 | $\pi$ -alkyl     |
| <b>2a</b> | BA2              | Ester                     | N185                                | S-loop              | Hydrogen bond    |
|           |                  | Amine                     | T183                                | S-loop              | Hydrogen bond    |
|           |                  |                           | NAD                                 | -                   | Ionic            |
|           |                  | 4,5-dihydroisoxazole ring | C153                                | S9-H4-loop          | Alkyl            |
|           |                  |                           | H180                                | S10                 | $\pi$ -alkyl     |
| <b>2b</b> | BA1              | Amine                     | T154                                | S9-H4-loop          | Hydrogen bond    |
|           |                  |                           | T214                                | Active-site segment | Hydrogen bond    |
|           |                  | 4,5-dihydroisoxazole ring | C153                                | S9-H4-loop          | Alkyl            |
|           |                  |                           | H180                                | S10                 | $\pi$ -alkyl     |
| <b>2b</b> | BA2              | Ester                     | R237                                | S11                 | Hydrogen bond    |
|           |                  | Amine                     | T183                                | S-loop              | Hydrogen bond    |
|           |                  |                           | NAD (H <sub>2</sub> O)              | -                   | Hydrogen bond    |
|           |                  |                           | C153                                | S9-H4-loop          | Alkyl            |
|           |                  | 4,5-dihydroisoxazole ring | H180                                | S10                 | $\pi$ -alkyl     |
|           |                  |                           | NAD (H <sub>2</sub> O)              | -                   | Hydrogen bond    |
| <b>2c</b> | BA1              | Ester                     | T183                                | S-loop              | CHO bond         |
|           |                  |                           | H180                                | S10                 | $\pi$ -alkyl     |
|           |                  | Amine                     | T154                                | S9-H4-loop          | Hydrogen bond    |
|           |                  |                           | H180                                | S10                 | Cation- $\pi$    |
|           |                  | 4,5-dihydroisoxazole ring | C153                                | S9-H4-loop          | Alkyl            |
|           |                  |                           | H180                                | S10                 | $\pi$ -alkyl     |
|           |                  |                           | NAD (H <sub>2</sub> O)              | -                   | Hydrogen bond    |
| <b>2c</b> | BA2              | Ester                     | R237                                | S11                 | Hydrogen bond    |
|           |                  | Amine                     | N185                                | S-loop              | Hydrogen bond    |
|           |                  |                           | NAD (H <sub>2</sub> O)              | -                   | Hydrogen bond    |
|           |                  |                           | C153                                | S9-H4-loop          | Alkyl            |
|           |                  | 4,5-dihydroisoxazole ring | H180                                | S10                 | $\pi$ -alkyl     |
|           |                  |                           | NAD                                 | -                   | $\pi$ -alkyl     |
| <b>2d</b> | BA1              | Ester                     | S213                                | Active-site segment | CHO bond         |
|           |                  | Amine                     | T154                                | S9-H4-loop          | Hydrogen bond    |
|           |                  |                           | T214                                | Active-site segment | Hydrogen bond    |
|           |                  | 4,5-dihydroisoxazole ring | C153                                | S9-H4-loop          | Alkyl            |
|           |                  |                           | H180                                | S10                 | $\pi$ -alkyl     |
|           |                  |                           | NAD                                 | -                   | $\pi$ -alkyl     |
| <b>2d</b> | BA2              | Ester                     | N185                                | S-loop              | Hydrogen bond    |
|           |                  | Ammine                    | NAD (H <sub>2</sub> O)              | -                   | Hydrogen bond    |
|           |                  |                           | C153                                | S9-H4-loop          | Alkyl            |
|           |                  | 4,5-dihydroisoxazole ring | H180                                | S10                 | $\pi$ -alkyl     |
|           |                  |                           | NAD                                 | -                   | $\pi$ -alkyl     |

**Table S37.** Ligand-residue interactions of the *Pf*GAPDH/**3a**, *Pf*GAPDH/**3b**, *Pf*GAPDH/**3c**, and *Pf*GAPDH/**3d** docked complexes.

| Cmpd      | Binding approach | Ligand Group/Function     | <i>Pf</i> GAPDH interacting residue | Substructure        | Interaction type |
|-----------|------------------|---------------------------|-------------------------------------|---------------------|------------------|
| <b>3a</b> | BA1              | Amine                     | T214                                | Active-site segment | Hydrogen bond    |
|           |                  |                           | S152                                | S9-H4-loop          | CHO bond         |
|           |                  | 4,5-dihydroisoxazole ring | C153                                | S9-H4-loop          | Alkyl            |
|           |                  |                           | H180                                | S10                 | $\pi$ -alkyl     |
| <b>3a</b> | BA2              | Amine                     | NAD (H <sub>2</sub> O)              | -                   | Hydrogen bond    |
|           |                  |                           | C153                                | S9-H4-loop          | Alkyl            |
|           |                  | 4,5-dihydroisoxazole ring | H180                                | S10                 | $\pi$ -alkyl     |
|           |                  |                           | NAD                                 | -                   | $\pi$ -alkyl     |
| <b>3b</b> | BA1              | Amine                     | T154                                | S9-H4-loop          | Hydrogen bond    |
|           |                  |                           | H180                                | S10                 | Cation- $\pi$    |
|           |                  | 4,5-dihydroisoxazole ring | C153                                | S9-H4-loop          | Alkyl            |
|           |                  |                           | H180                                | S10                 | $\pi$ -alkyl     |
| <b>3b</b> | BA2              |                           | NAD (H <sub>2</sub> O)              | -                   | Hydrogen bond    |
|           |                  | Amine                     | T183                                | S-loop              | Hydrogen bond    |
|           |                  |                           | S182                                | S-loop              | Hydrogen bond    |
|           |                  | 4,5-dihydroisoxazole ring | E320 (H <sub>2</sub> O)             | S16-H8-loop         | Hydrogen bond    |
| <b>3c</b> | BA1              | Amine                     | T154                                | S9-H4-loop          | Hydrogen bond    |
|           |                  |                           | H180                                | S10                 | Cation- $\pi$    |
|           |                  | Phenyl                    | N185                                | S-loop              | $\pi$ - $\pi$    |
|           |                  | 4,5-dihydroisoxazole ring | C153                                | S9-H4-loop          | Alkyl            |
| <b>3c</b> | BA2              |                           | H180                                | S10                 | $\pi$ -alkyl     |
|           |                  | Ester                     | N185                                | S-loop              | Hydrogen bond    |
|           |                  |                           | R237                                | S11                 | Hydrogen bond    |
|           |                  | Amine                     | NAD                                 | -                   | Cation- $\pi$    |
| <b>3c</b> | BA2              | Phenyl                    | A235                                | S11                 | $\pi$ -alkyl     |
|           |                  |                           | C153                                | S9-H4-loop          | Alkyl            |
|           |                  | 4,5-dihydroisoxazole ring | H180                                | S10                 | $\pi$ -alkyl     |
|           |                  |                           | NAD                                 | -                   | $\pi$ -alkyl     |
| <b>3d</b> | BA1              | Ester                     | S213                                | Active-site segment | CHO bond         |
|           |                  |                           | T214                                | Active-site segment | CHO bond         |
|           |                  | Amine                     | H180                                | S10                 | Cation- $\pi$    |
|           |                  | 4,5-dihydroisoxazole ring | C153                                | S9-H4-loop          | Alkyl            |
| <b>3d</b> | BA2              |                           | H180                                | S10                 | $\pi$ -alkyl     |
|           |                  | Ester                     | R237                                | S11                 | Hydrogen bond    |
|           |                  |                           | N185                                | S-loop              | Hydrogen bond    |
|           |                  | Amine                     | NAD                                 | -                   | Ionic            |
| <b>3d</b> | BA2              | Phenyl                    | A235                                | S11                 | $\pi$ -alkyl     |
|           |                  |                           | C153                                | S9-H4-loop          | Alkyl            |
|           |                  | 4,5-dihydroisoxazole ring | H180                                | S10                 | $\pi$ -alkyl     |
|           |                  |                           | NAD                                 | -                   | $\pi$ -alkyl     |



**Table S38.** Ligand-residue interactions of the *Pf*GAPDH/**4a**, *Pf*GAPDH/**4b**, *Pf*GAPDH/**4c**, and *Pf*GAPDH/**4d** docked complexes.

| Cmpd      | Binding approach | Ligand Group              | <i>Pf</i> GAPDH interacting residue | Substructure        | Interaction type |
|-----------|------------------|---------------------------|-------------------------------------|---------------------|------------------|
| <b>4a</b> | BA1              | Amine                     | T214                                | Active-site segment | Hydrogen bond    |
|           |                  |                           | S152                                | S9-H4-loop          | CHO bond         |
|           |                  | 4,5-dihydroisoxazole ring | C153                                | S9-H4-loop          | Hydrogen bond    |
|           |                  |                           | H180                                | S10                 | $\pi$ -alkyl     |
| <b>4a</b> | BA2              | Amide                     | R237                                | S11                 | Hydrogen bond    |
|           |                  |                           | NAD                                 | -                   | Hydrogen bond    |
|           |                  |                           | NAD (H <sub>2</sub> O)              | -                   | Hydrogen bond    |
|           |                  | Amine                     | S182                                | S-loop              | Hydrogen bond    |
|           |                  |                           | T183                                | S-loop              | Hydrogen bond    |
|           |                  | Phenyl                    | A123                                | S7-S8-loop          | $\pi$ -alkyl     |
|           |                  | 4,5-dihydroisoxazole ring | H180                                | S10                 | $\pi$ -alkyl     |
|           |                  |                           | C153                                | S9-H4-loop          | Alkyl            |
| <b>4b</b> | BA1              | Amide                     | N185                                | S-loop              | Hydrogen bond    |
|           |                  |                           | H180                                | S10                 | Hydrogen bond    |
|           |                  |                           | A181                                | S10                 | Hydrogen bond    |
|           |                  | Amine                     | T183                                | S-loop              | Hydrogen bond    |
|           |                  |                           | Q186                                | S-loop              | Cation- $\pi$    |
|           |                  | Phenyl                    | A212                                | Active-site segment | $\pi$ -alkyl     |
|           |                  |                           | C153                                | S9-H4-loop          | Alkyl            |
|           |                  | 4,5-dihydroisoxazole ring | H180                                | S10                 | $\pi$ -alkyl     |
|           |                  |                           | NAD                                 | -                   | $\pi$ -alkyl     |
|           |                  |                           |                                     |                     |                  |
| <b>4b</b> | BA2              | Amide                     | N185                                | S-loop              | Hydrogen bond    |
|           |                  |                           | NAD (H <sub>2</sub> O)              | -                   | Hydrogen bond    |
|           |                  |                           |                                     |                     |                  |
|           |                  | Amine                     | S182                                | S-loop              | Hydrogen bond    |
|           |                  |                           | T183                                | S-loop              | Hydrogen bond    |
|           |                  | Phenyl                    | P124                                | S7-S8-loop          | $\pi$ -alkyl     |
|           |                  |                           | A216                                | Active-site segment | $\pi$ -alkyl     |
|           |                  | 4,5-dihydroisoxazole ring | H180                                | S10                 | $\pi$ -alkyl     |
| <b>4c</b> | BA1              | Amine                     | T154                                | S9-H4-loop          | Hydrogen bond    |
|           |                  |                           | H180                                | S10                 | Cation- $\pi$    |
|           |                  | 4,5-dihydroisoxazole ring | C153                                | S9-H4-loop          | Alkyl            |
|           |                  |                           | H180                                | S10                 | $\pi$ -alkyl     |
| <b>4c</b> | BA2              | Amide                     | N185                                | S-loop              | Hydrogen bond    |
|           |                  | Amine                     | NAD                                 | -                   | Hydrogen bond    |
|           |                  |                           | A235                                | S11                 | $\pi$ -alkyl     |
|           |                  | Phenyl                    | R237                                | S11                 | Cation- $\pi$    |
|           |                  |                           | C153                                | S9-H4-loop          | Alkyl            |
|           |                  | 4,5-dihydroisoxazole ring | H180                                | S10                 | $\pi$ -alkyl     |
|           |                  |                           | NAD                                 | -                   | $\pi$ -alkyl     |
|           |                  |                           |                                     |                     |                  |
| <b>4d</b> | BA1              | Amide                     | T214                                | Active-site segment | Hydrogen bond    |
|           |                  | Amine                     | H180                                | S10                 | Cation- $\pi$    |
|           |                  | Phenyl                    | P124                                | S7-S8-loop          | $\pi$ -alkyl     |
|           |                  | 4,5-dihydroisoxazole ring | C153                                | S9-H4-loop          | Alkyl            |
|           |                  |                           | H180                                | S10                 | $\pi$ -alkyl     |
| <b>4d</b> | BA2              | Amide                     | NAD                                 | -                   | Hydrogen bond    |
|           |                  | Amine                     | NAD                                 | -                   | Ionic            |
|           |                  |                           | N185                                | S-loop              | Hydrogen bond    |
|           |                  | Phenyl                    | P124                                | S7-S8-loop          | $\pi$ -alkyl     |
|           |                  |                           | A216                                | Active-site segment | $\pi$ -alkyl     |
|           |                  | 4,5-dihydroisoxazole ring | NAD                                 | -                   | $\pi$ -alkyl     |
|           |                  |                           |                                     |                     |                  |

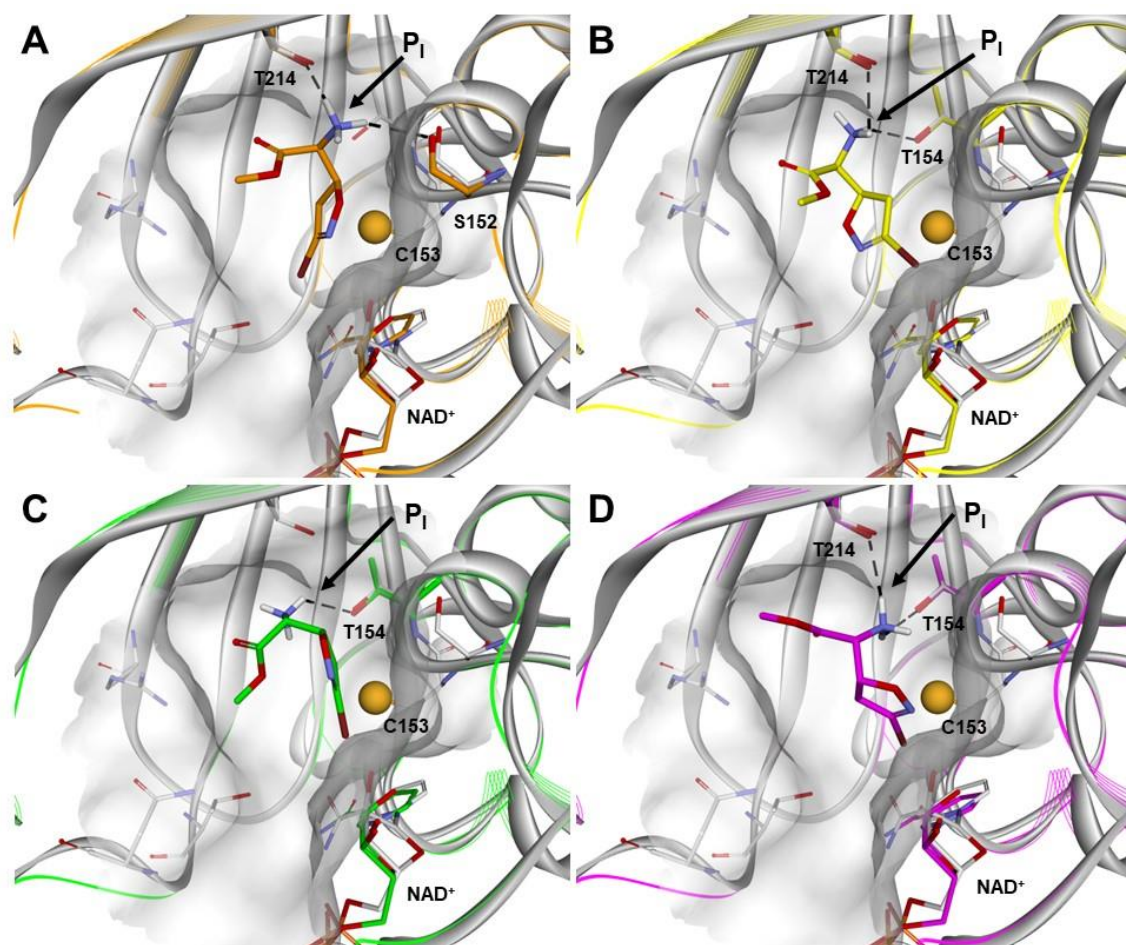

**Figure S1.** Docked complexes of **2a** (orange), **2b** (yellow), **2c** (green) and **2d** (magenta) bound to  $P_i$  site of *PfGAPDH*. The starting protein (gray) is displayed as Connolly surface and solid ribbons. The key interaction residues are displayed and labelled. The ligands,  $NAD^+$  and C153, as well as the residues involved in the interactions with ligands (stick) are colored by atom type (N, blue; O, red; S, yellow; Br, brown). The sulfur atom of C153 is displayed in CPK (scaled by 50%). Hydrogen atoms are omitted for clarity, except those involved in hydrogen bond interactions (black dashed lines).

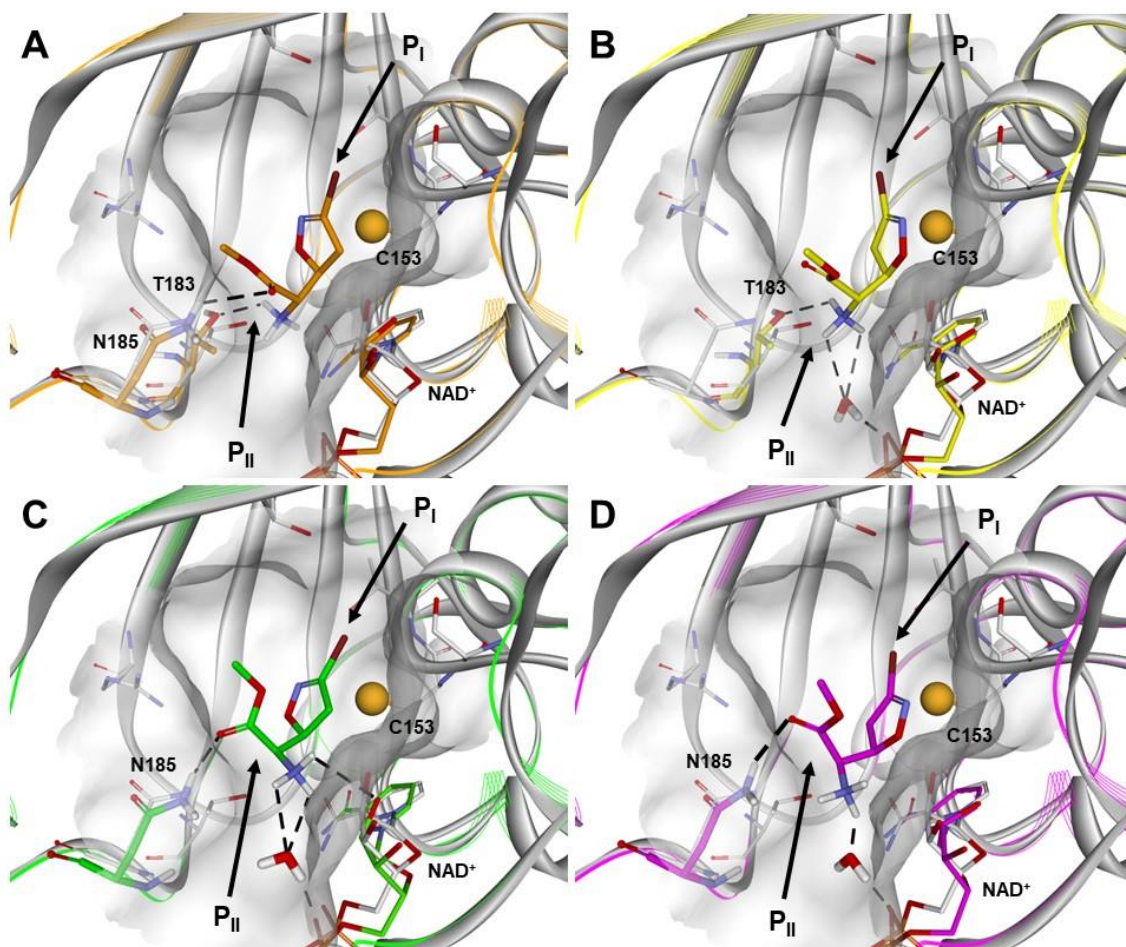

**Figure S2.** Docked complexes of **2a** (orange), **2b** (yellow), **2c** (green) and **2d** (magenta) bound to P<sub>II</sub> site of *Pf*GAPDH. The starting protein (gray) is displayed as Connolly surface and solid ribbons. The key interaction residues are displayed and labelled. The ligands, NAD<sup>+</sup> and C153, as well as the residues involved in the interactions with ligands (stick) are colored by atom type (N, blue; O, red; S, yellow; Br, brown). The sulfur atom of C153 is displayed in CPK (scaled by 50%). Hydrogen atoms are omitted for clarity, except those involved in hydrogen bond interactions (black dashed lines).



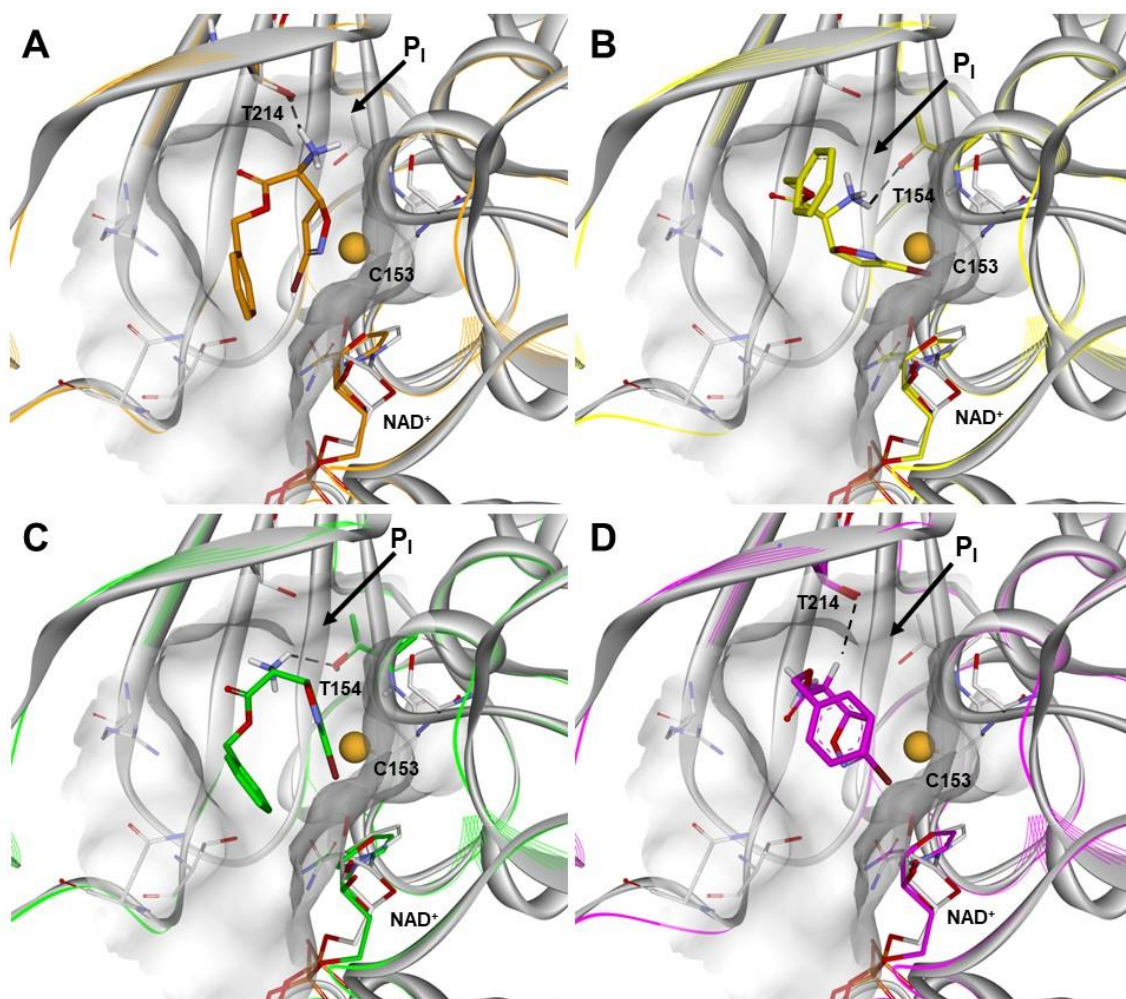

**Figure S3.** Docked complexes of **3a** (orange), **3b** (yellow), **3c** (green) and **3d** (magenta) bound to P<sub>I</sub> site of *Pf*GAPDH. The starting protein (gray) is displayed as Connolly surface and solid ribbons. The key interaction residues are displayed and labelled. The ligands, NAD<sup>+</sup> and C153, as well as the residues involved in the interactions with ligands (stick) are colored by atom type (N, blue; O, red; S, yellow; Br, brown). The sulfur atom of C153 is displayed in CPK (scaled by 50%). Hydrogen atoms are omitted for clarity, except those involved in hydrogen bond interactions (black dashed lines).

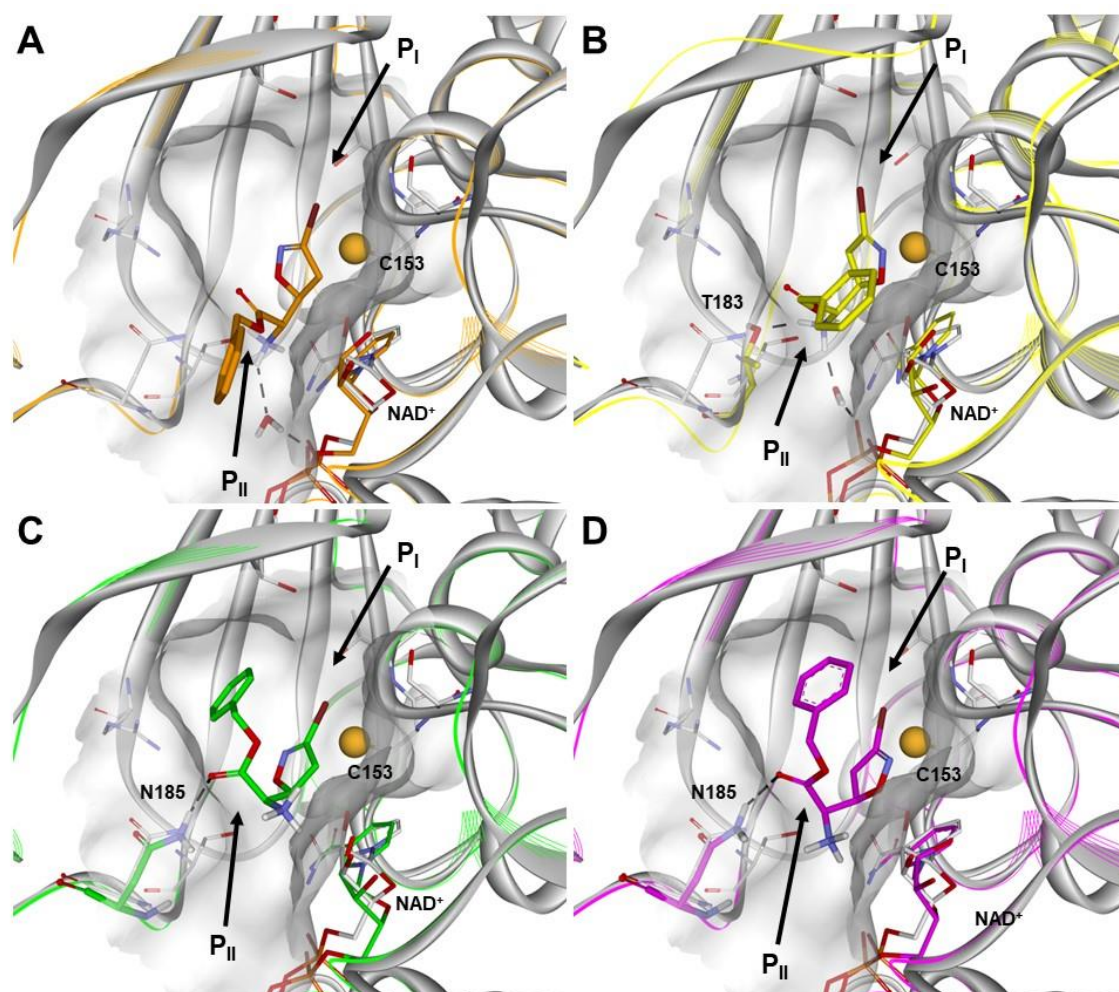

**Figure S4.** Docked complexes of **3a** (orange), **3b** (yellow), **3c** (green) and **3d** (magenta) bound to P<sub>II</sub> site of *Pf*GAPDH. The starting protein (gray) is displayed as Connolly surface and solid ribbons. The key interaction residues are displayed and labelled. The ligands, NAD<sup>+</sup> and C153, as well as the residues involved in the interactions with ligands (stick) are colored by atom type (N, blue; O, red; S, yellow; Br, brown). The sulfur atom of C153 is displayed in CPK (scaled by 50%). Hydrogen atoms are omitted for clarity, except those involved in hydrogen bond interactions (black dashed lines).



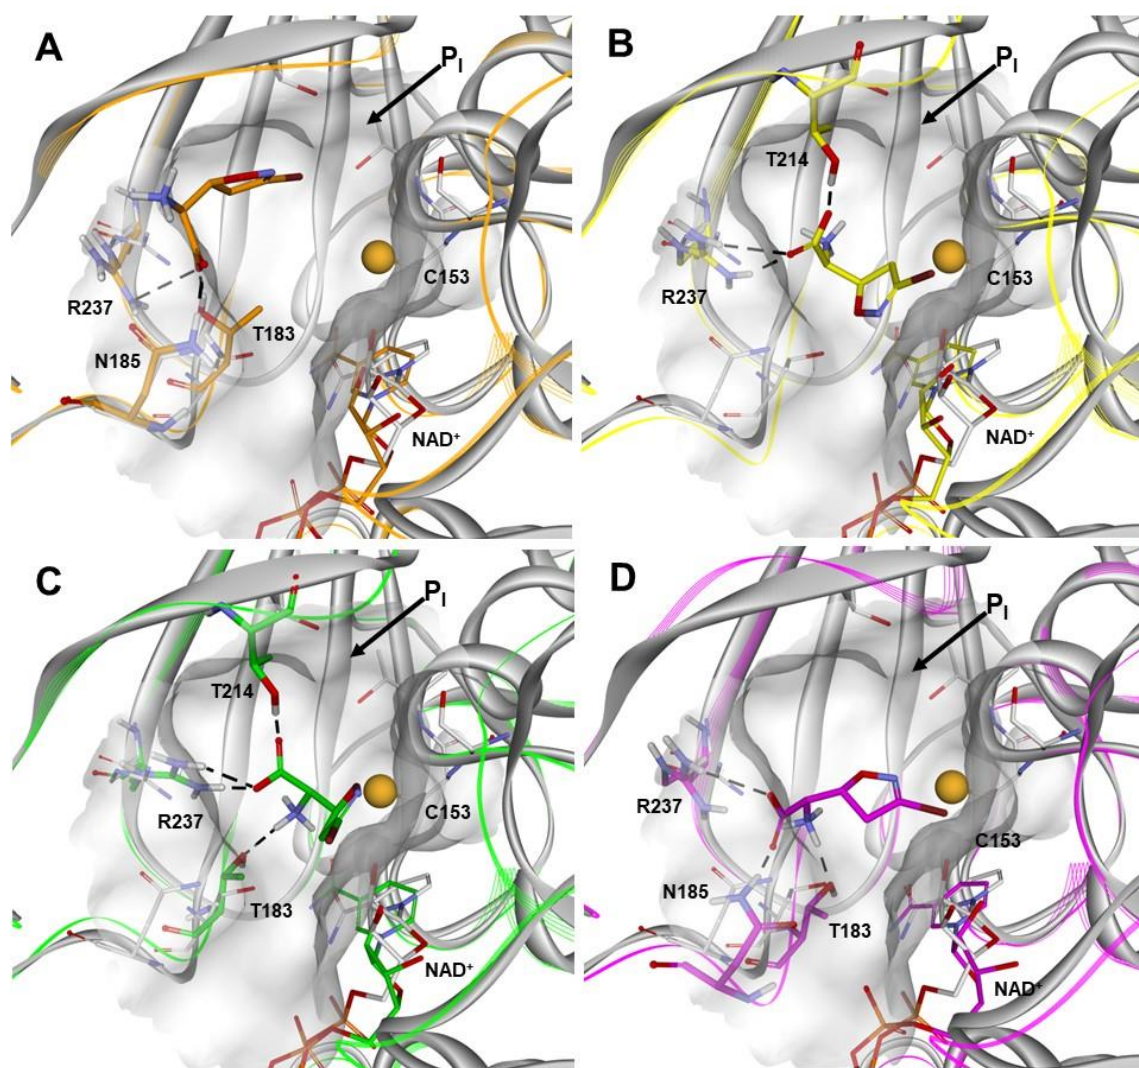

**Figure S5.** Docked complexes of **1a** (orange), **1b** (yellow), **1c** (green) and **1d** (magenta) bound to P<sub>I</sub> site of *Pf*GAPDH. The starting protein (gray) is displayed as Connolly surface and solid ribbons. The key interaction residues are displayed and labelled. The ligands, NAD<sup>+</sup> and C153, as well as the residues involved in the interactions with ligands (stick) are colored by atom type (N, blue; O, red; S, yellow; Br, brown). The sulfur atom of C153 is displayed in CPK (scaled by 50%). Hydrogen atoms are omitted for clarity, except those involved in hydrogen bond interactions (black dashed lines).

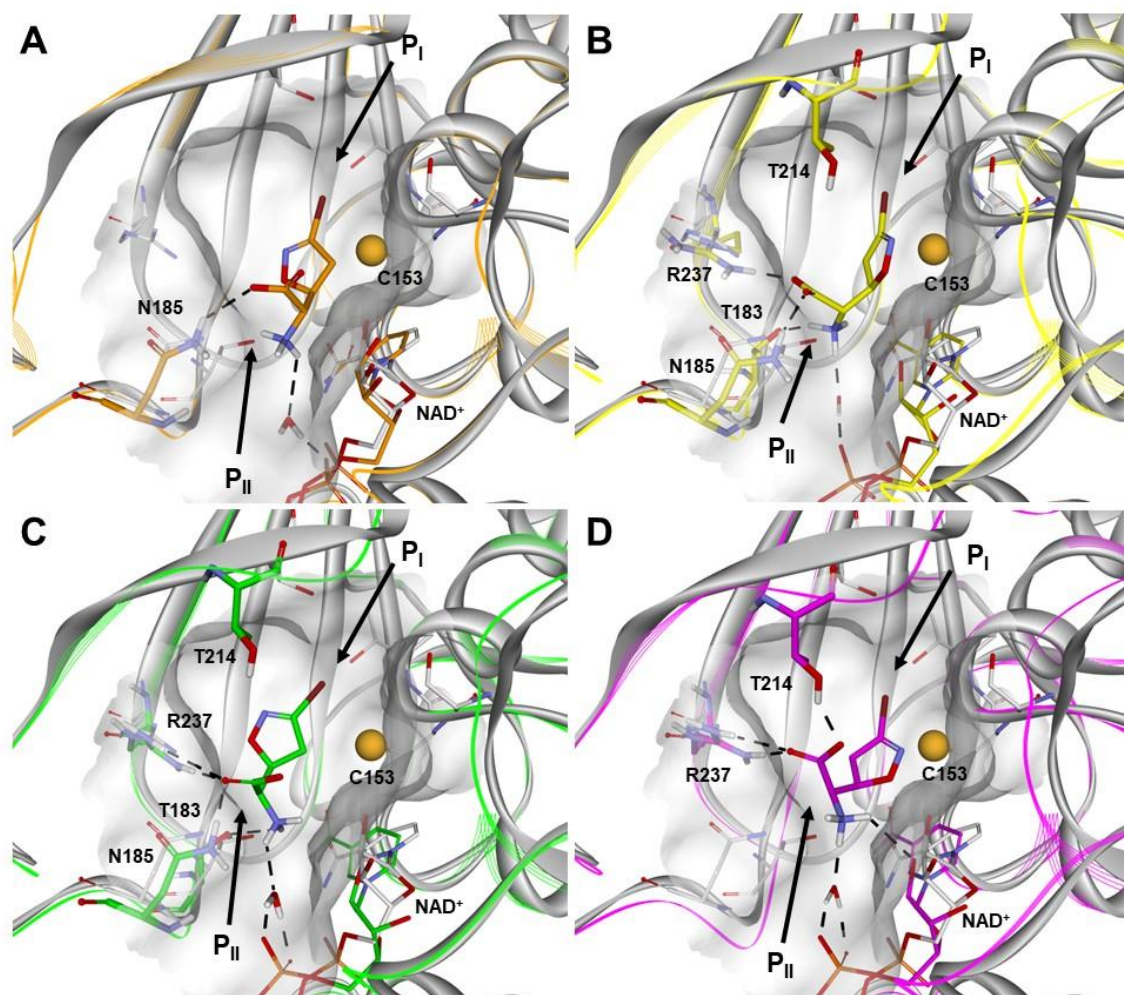

**Figure S6.** Docked complexes of **1a** (orange), **1b** (yellow), **1c** (green) and **1d** (magenta) bound to  $P_{II}$  site of *Pf*GAPDH. The starting protein (gray) is displayed as Connolly surface and solid ribbons. The key interaction residues are displayed and labelled. The ligands,  $NAD^+$  and C153, as well as the residues involved in the interactions with ligands (stick) are colored by atom type (N, blue; O, red; S, yellow; Br, brown). The sulfur atom of C153 is displayed in CPK (scaled by 50%). Hydrogen atoms are omitted for clarity, except those involved in hydrogen bond interactions (black dashed lines).



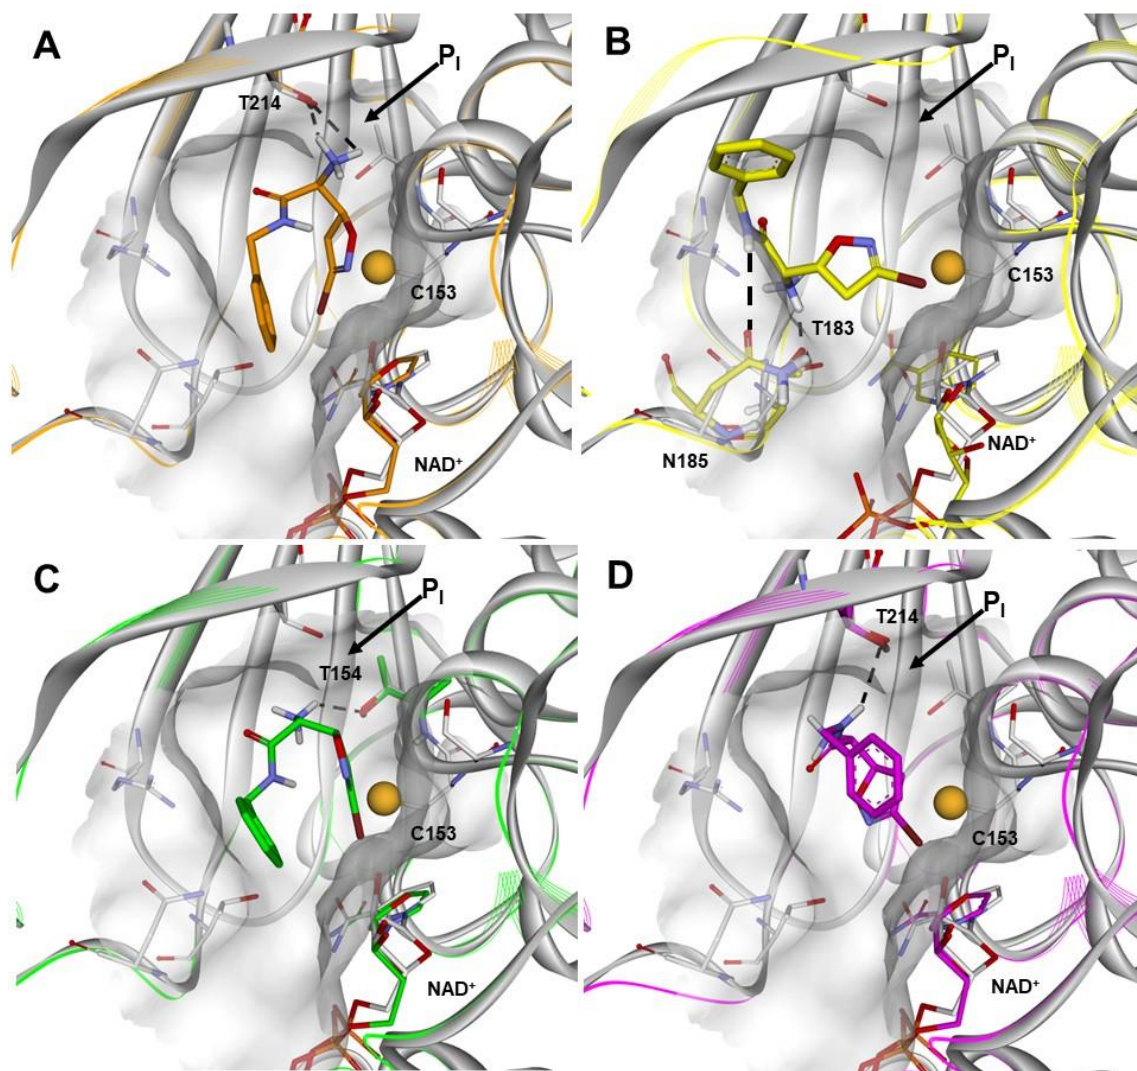

**Figure S7.** Docked complexes of **4a** (orange), **4b** (yellow), **4c** (green) and **4d** (magenta) bound to  $P_I$  site of *Pf*GAPDH. The starting protein (gray) is displayed as Connolly surface and solid ribbons. The key interaction residues are displayed and labelled. The ligands,  $NAD^+$  and C153, as well as the residues involved in the interactions with ligands (stick) are colored by atom type (N, blue; O, red; S, yellow; Br, brown). The sulfur atom of C153 is displayed in CPK (scaled by 50%). Hydrogen atoms are omitted for clarity, except those involved in hydrogen bond interactions (black dashed lines).



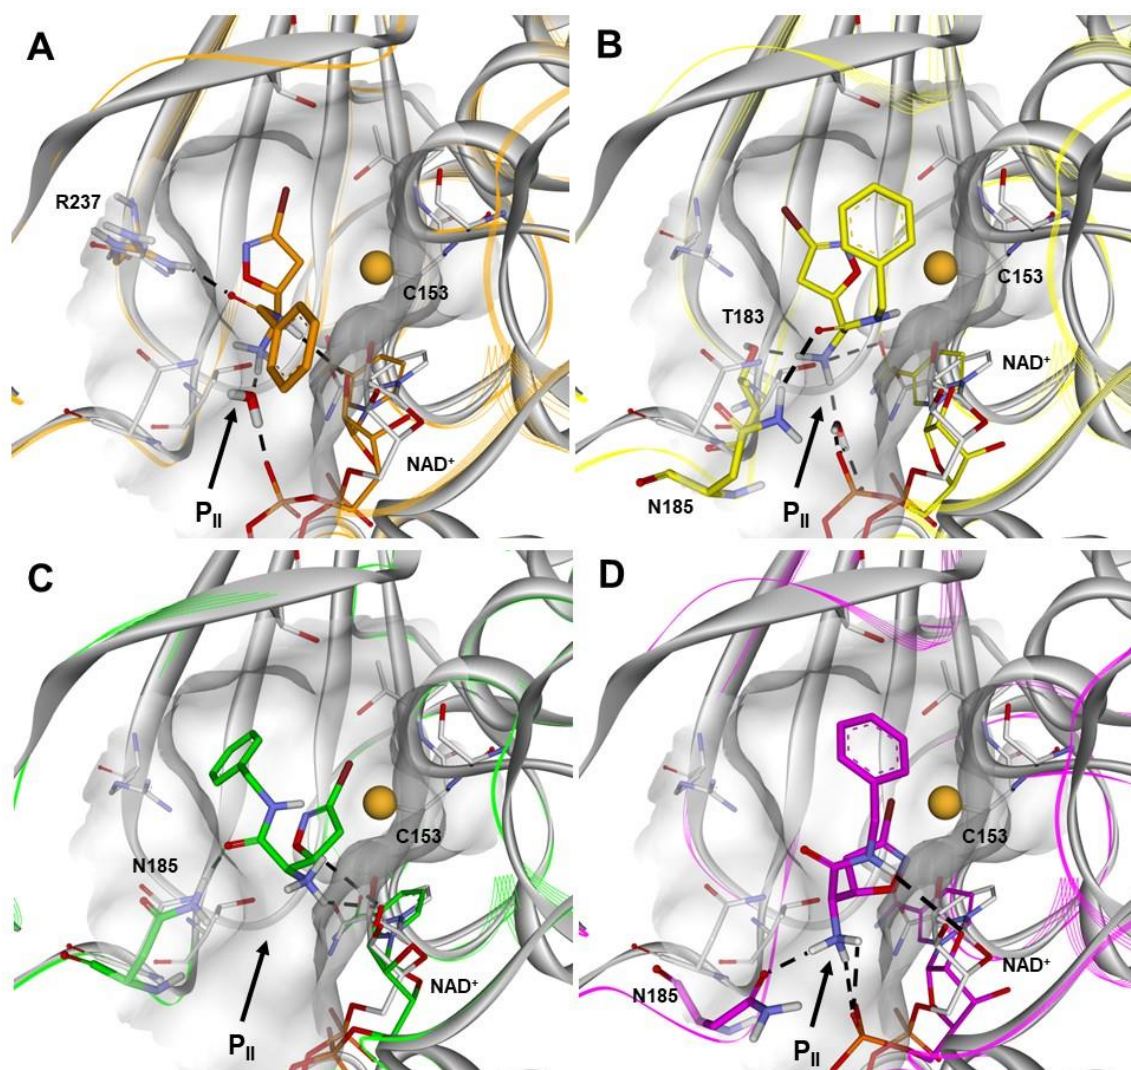

**Figure S8.** Docked complexes of **4a** (orange), **4b** (yellow), **4c** (green) and **4d** (magenta) bound to P<sub>II</sub> site of *Pf*GAPDH. The starting protein (gray) is displayed as Connolly surface and solid ribbons. The key interaction residues are displayed and labelled. The ligands, NAD<sup>+</sup> and C153, as well as the residues involved in the interactions with ligands (stick) are colored by atom type (N, blue; O, red; S, yellow; Br, brown). The sulfur atom of C153 is displayed in CPK (scaled by 50%). Hydrogen atoms are omitted for clarity, except those involved in hydrogen bond interactions (black dashed lines).

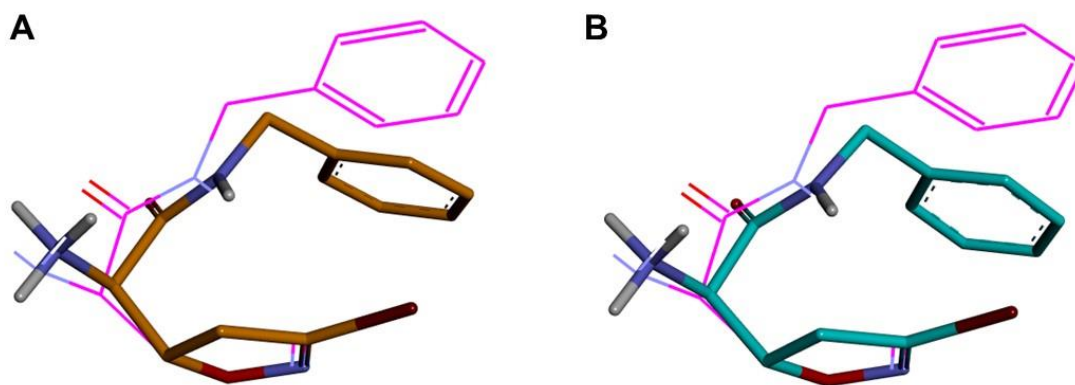

**Figure S9.** Superimposition of the two **4c** conformations obtained from docking studies (orange BA1; cyan BA2) on the corresponding local energy minimum conformer obtained from conformational analysis (magenta and lines). The structures are superimposed by of 4,5-dihydroisoxazole ring heavy atoms and colored by atom type (N, blue; O, red; Br, brown).

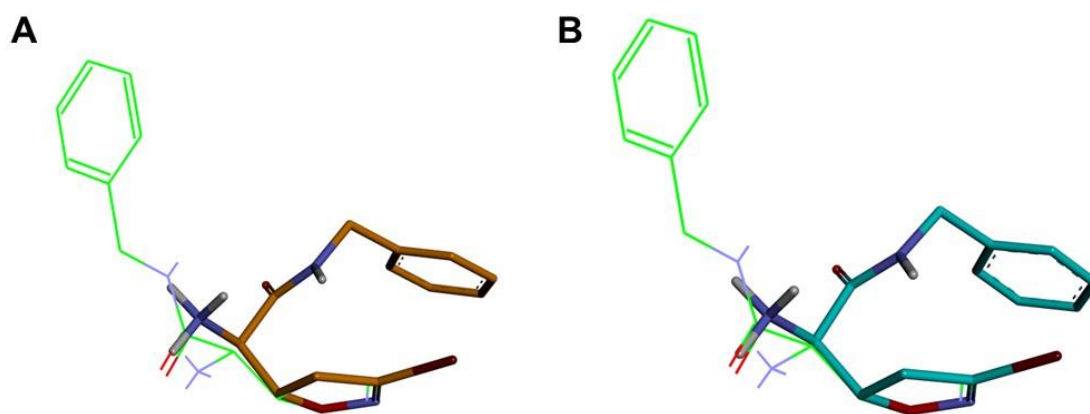

**Figure S10.** Superimposition of the two **4c** conformations obtained from docking studies (orange BA1; cyan BA2) on the global energy minimum conformer obtained from the conformational analysis (green and lines). The structures are superimposed by the 4,5-dihydroisoxazole ring heavy atoms and colored by atom type (N, blue; O, red; Br, brown).

# <sup>1</sup>H and <sup>13</sup>C{<sup>1</sup>H} NMR Spectra

(S)-2-amino-2-((R)-3-bromo-4,5-dihydroisoxazol-5-yl)acetic acid (**1b**):

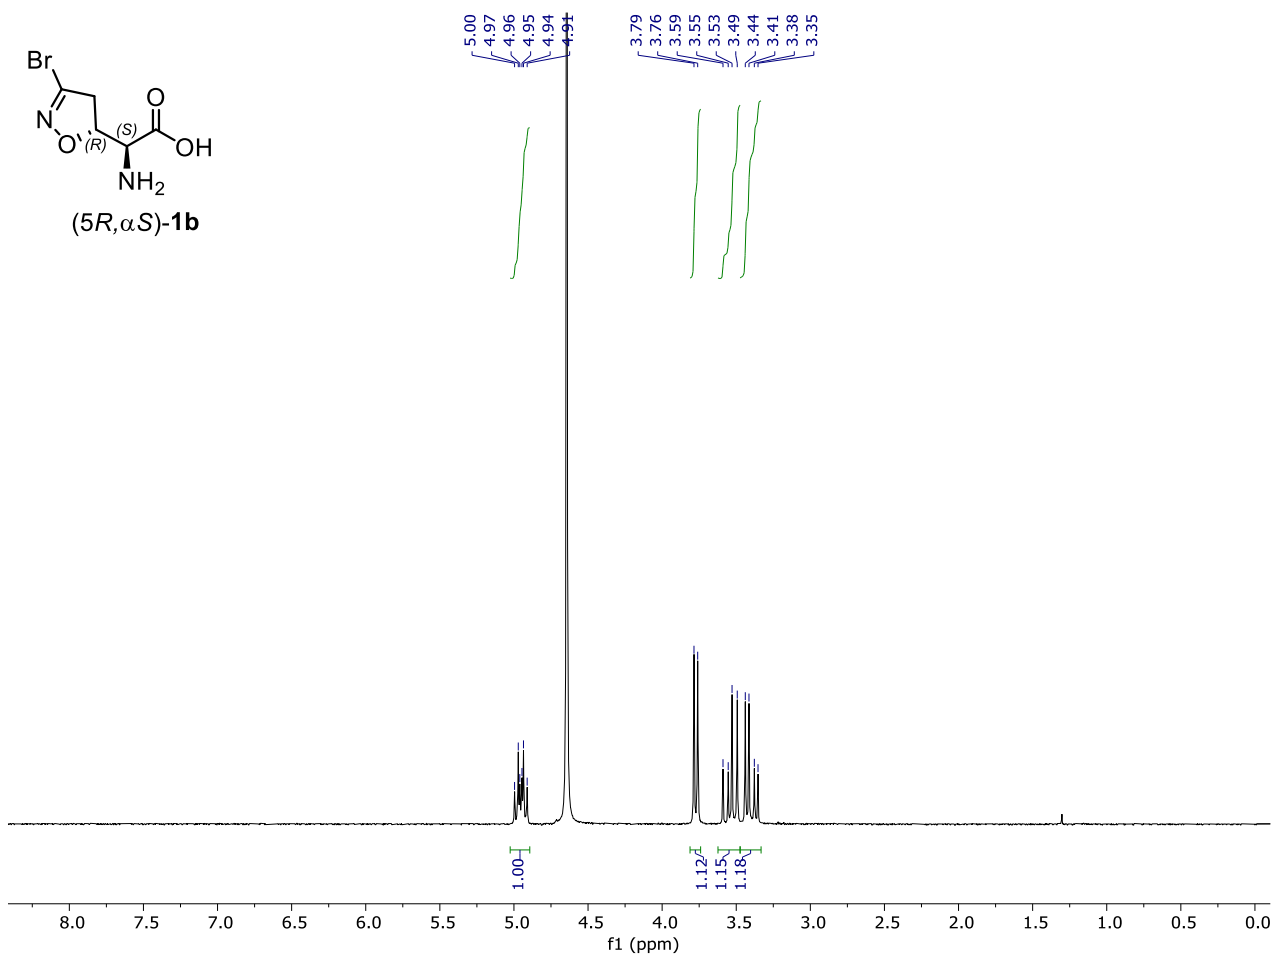

(*S*)-2-amino-2-((*R*)-3-bromo-4,5-dihydroisoxazol-5-yl)acetic acid (**1b**):

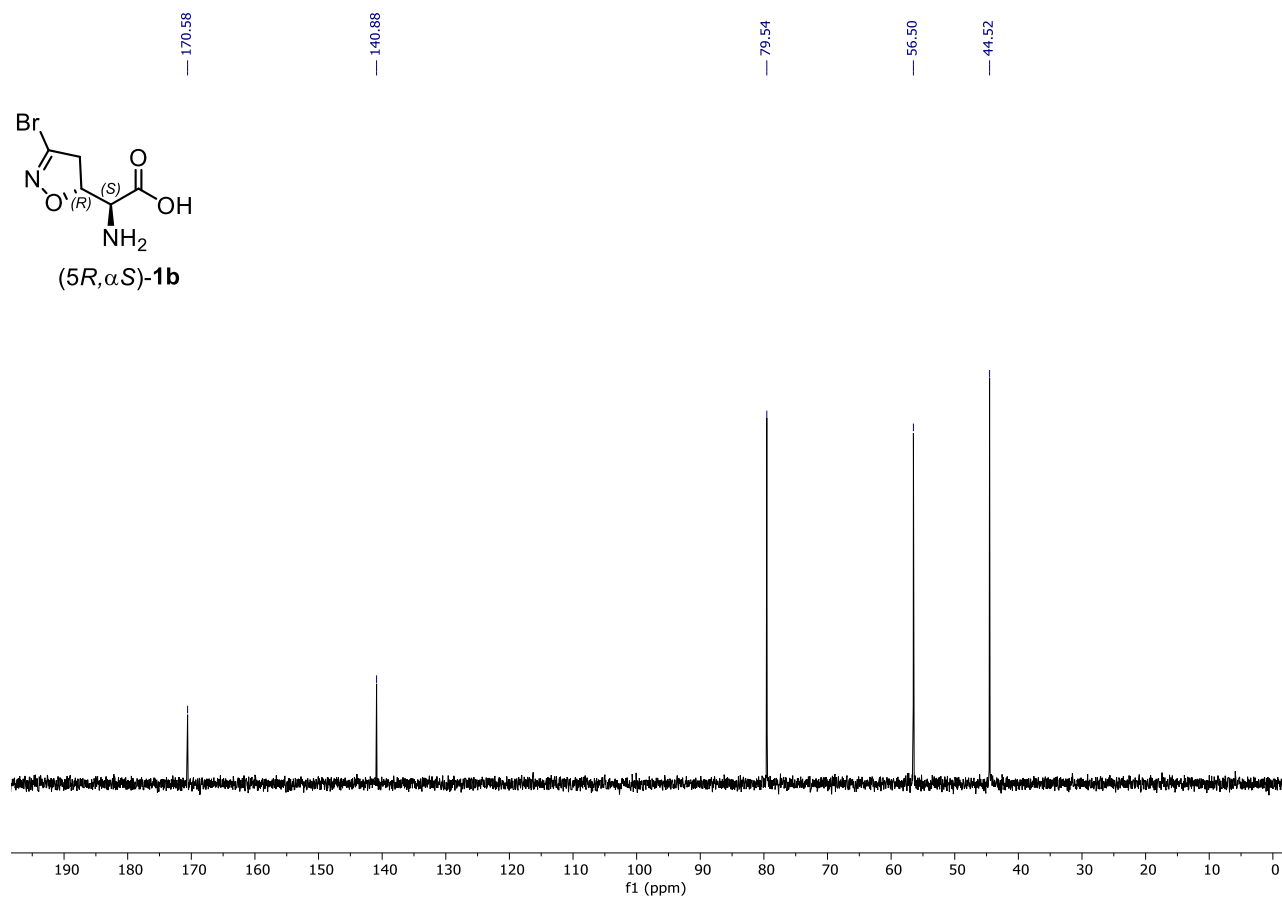

(*R*)-2-amino-2-((*R*)-3-bromo-4,5-dihydroisoxazol-5-yl)acetic acid (**1d**):

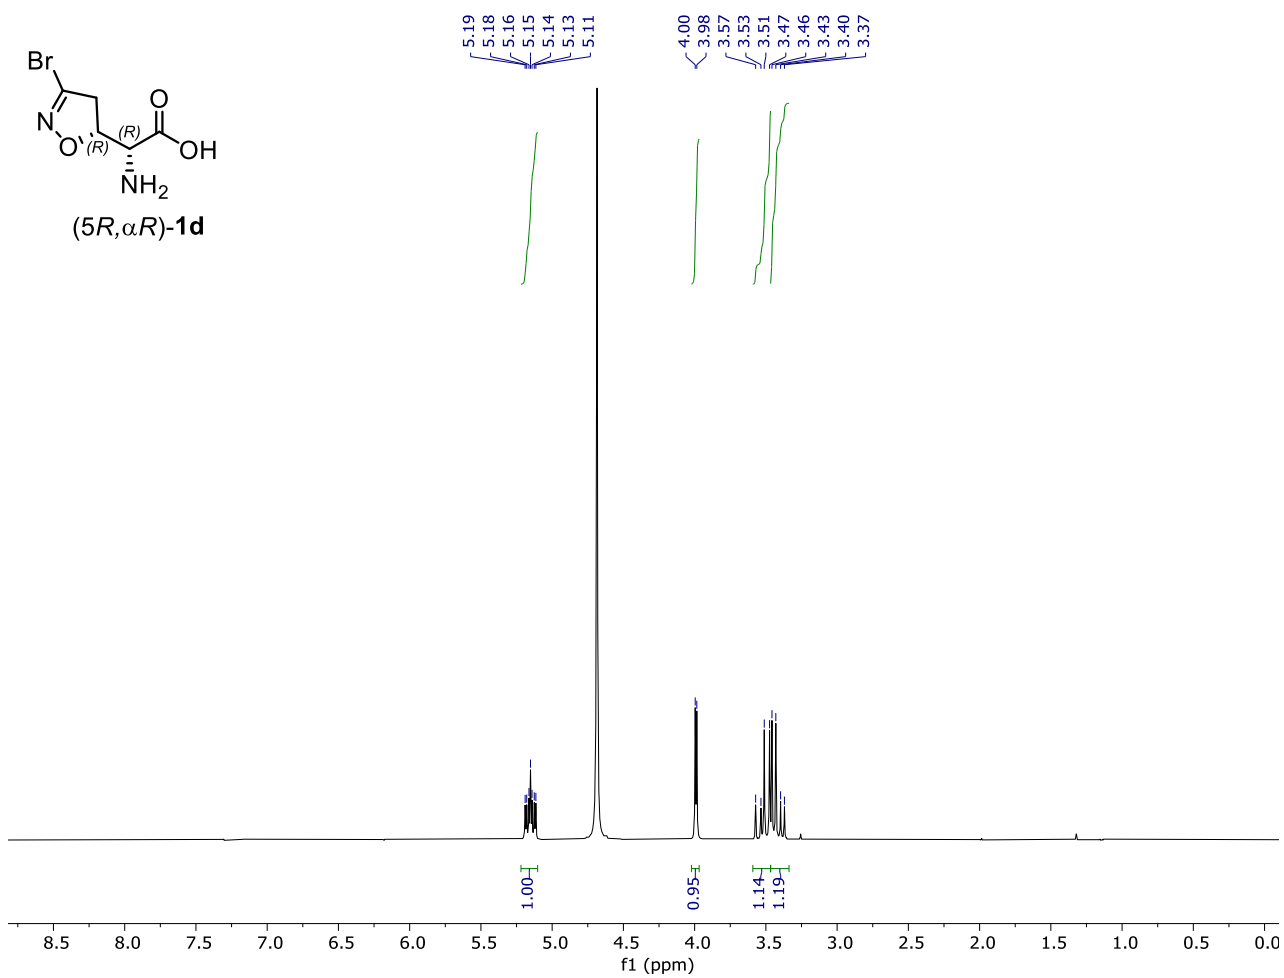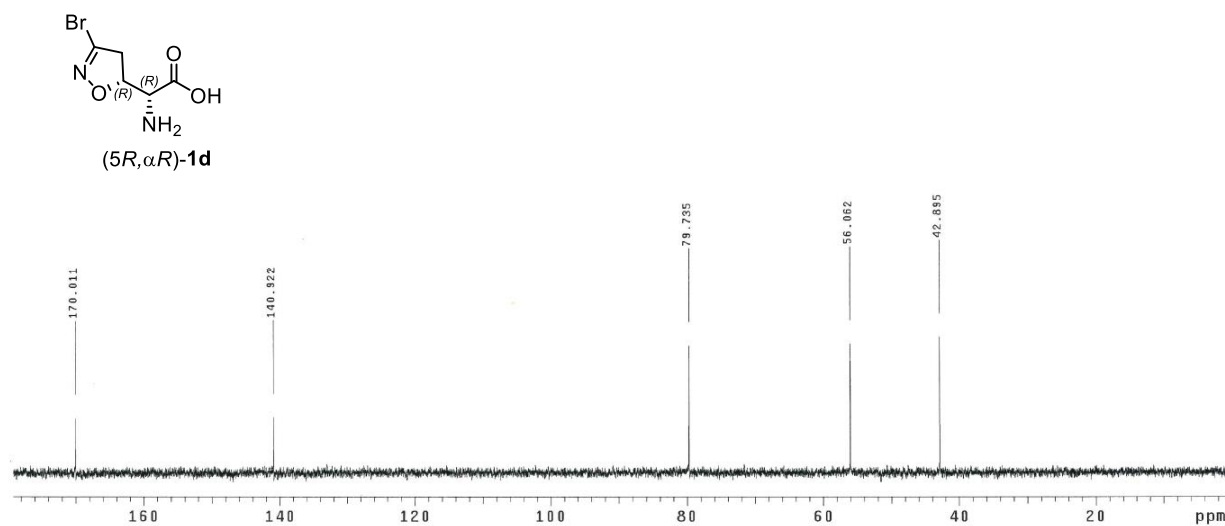

Methyl (*S*)-2-amino-2-((*R*)-3-bromo-4,5-dihydroisoxazol-5-yl)acetate (**2b**):

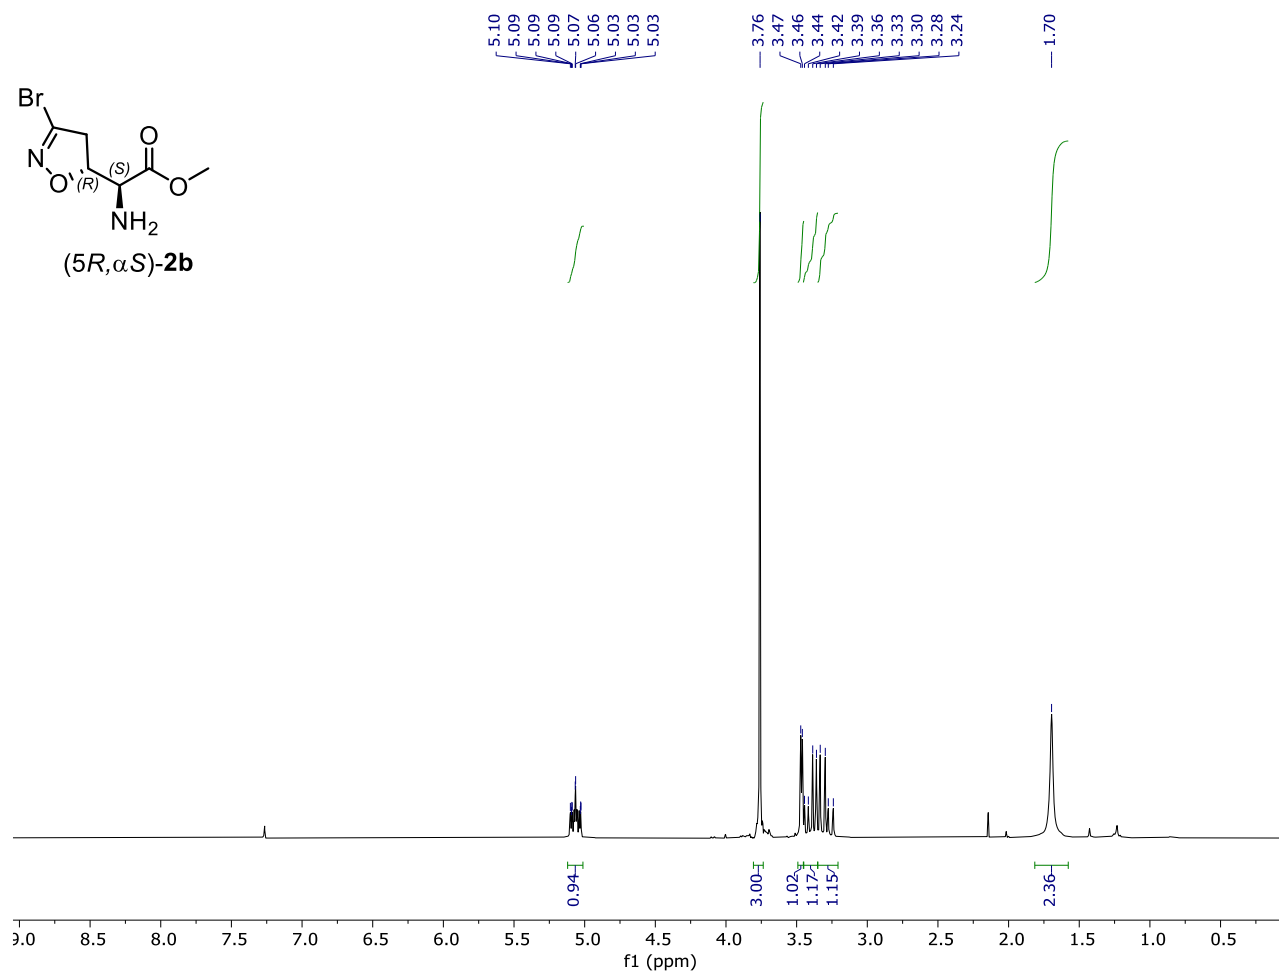

Methyl (*S*)-2-amino-2-((*R*)-3-bromo-4,5-dihydroisoxazol-5-yl)acetate (**2b**):

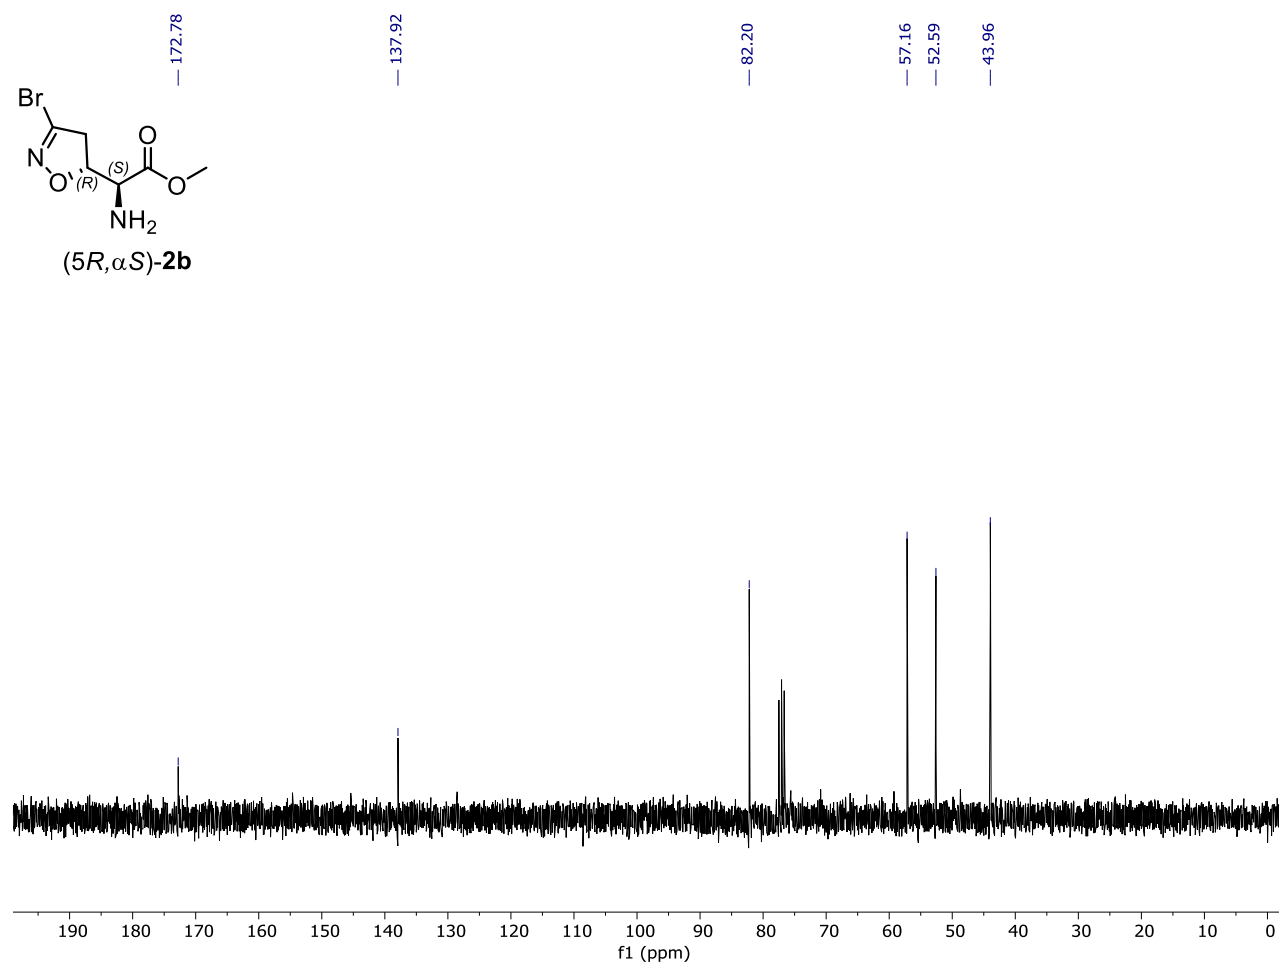



Methyl (*R*)-2-amino-2-((*R*)-3-bromo-4,5-dihydroisoxazol-5-yl)acetate (**2d**):

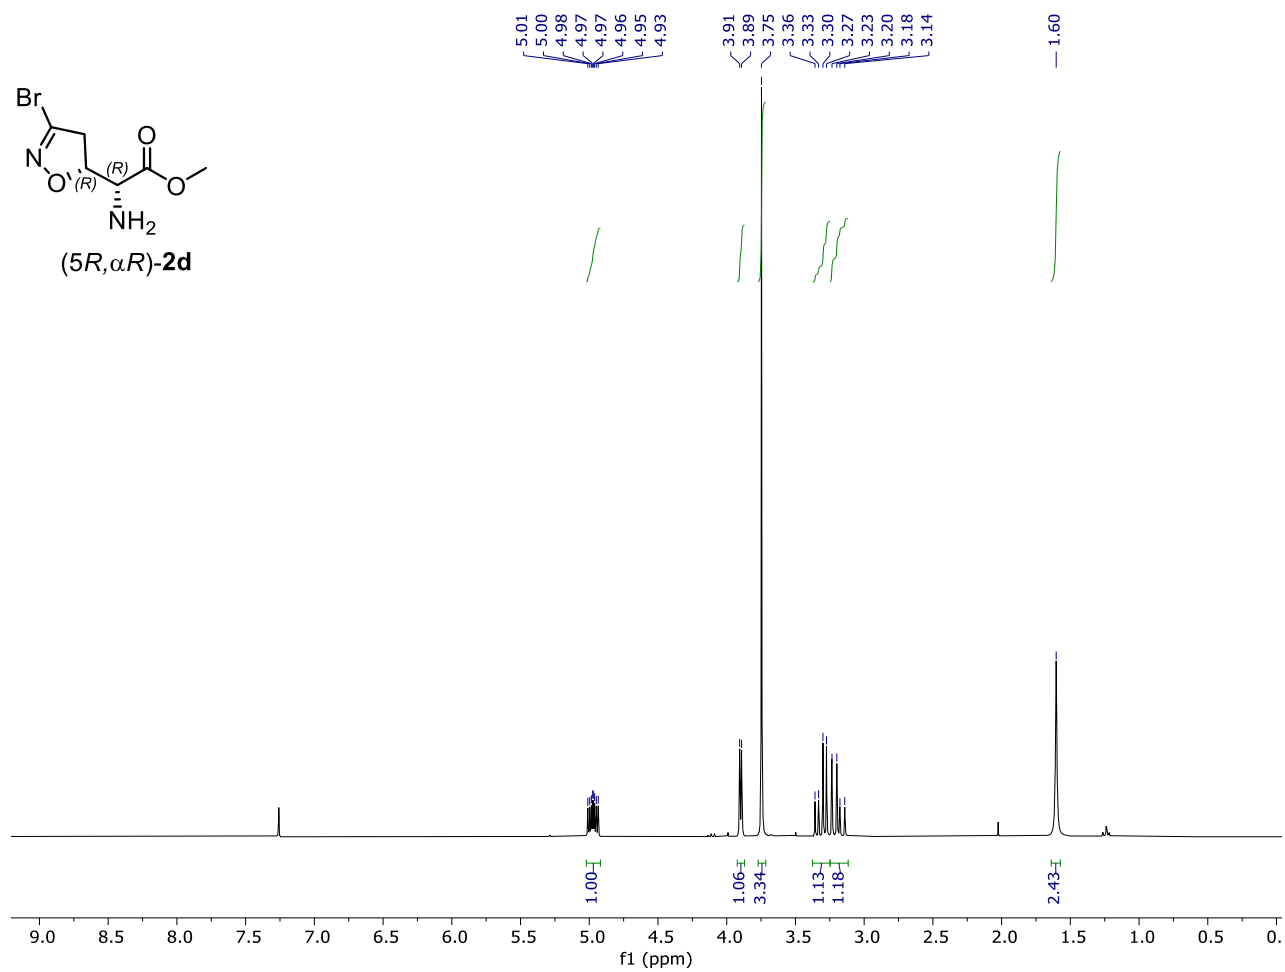

Methyl (*R*)-2-amino-2-((*R*)-3-bromo-4,5-dihydroisoxazol-5-yl)acetate (**2d**):

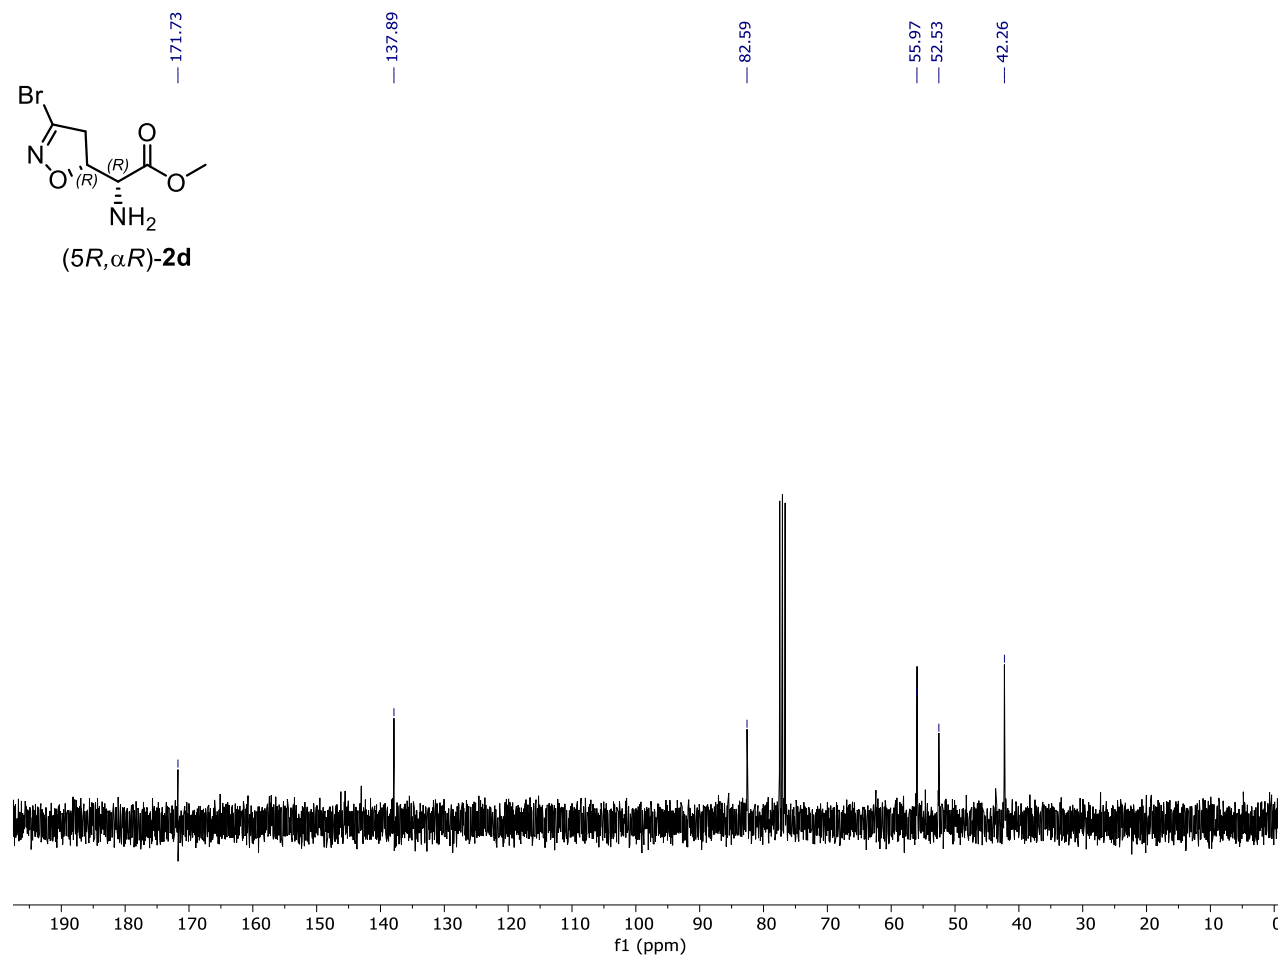

Benzyl (*S*)-2-amino-2-((*R*)-3-bromo-4,5-dihydroisoxazol-5-yl)acetate (**3b**):

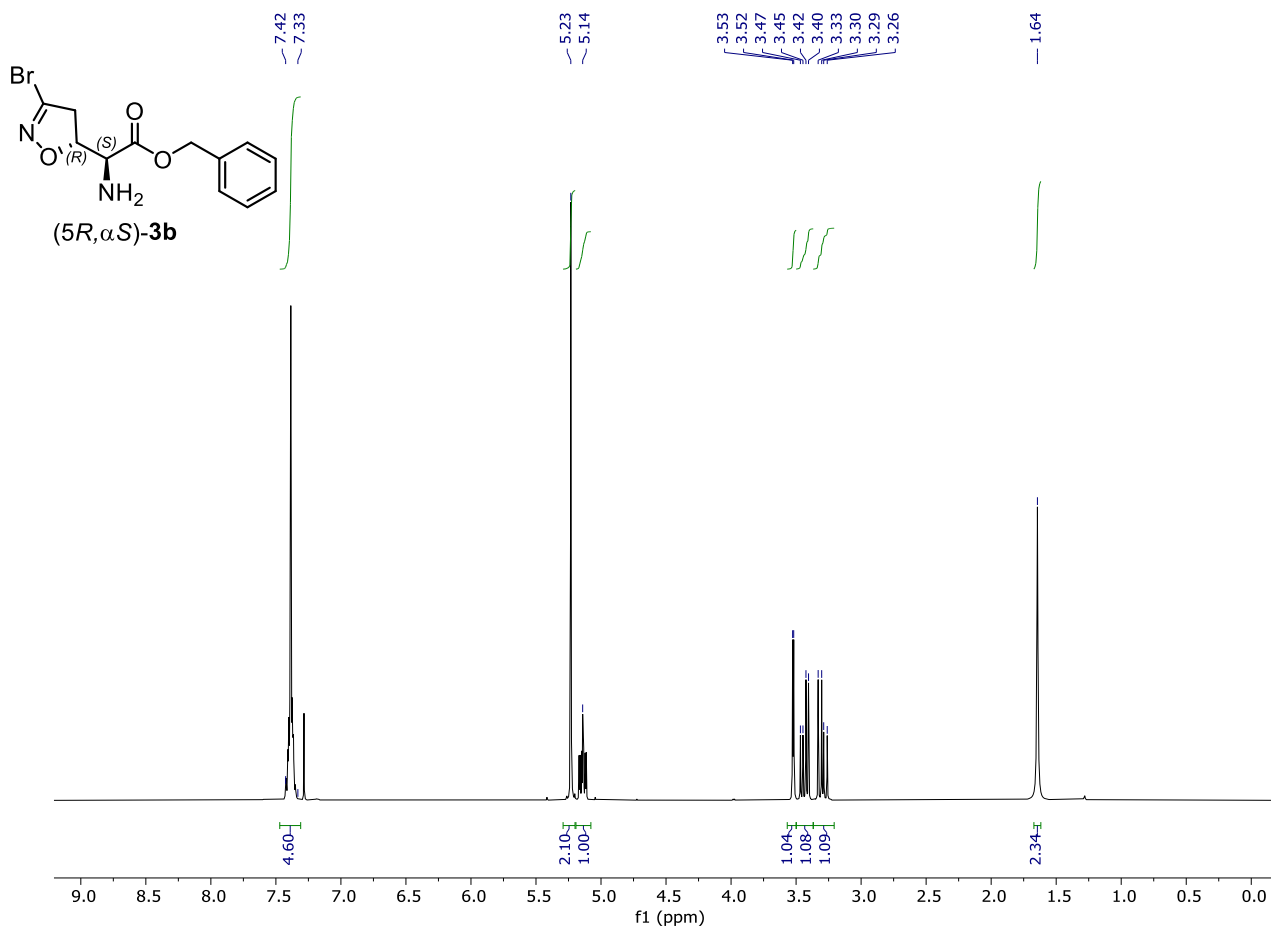

Benzyl (*S*)-2-amino-2-((*R*)-3-bromo-4,5-dihydroisoxazol-5-yl)acetate (**3b**):

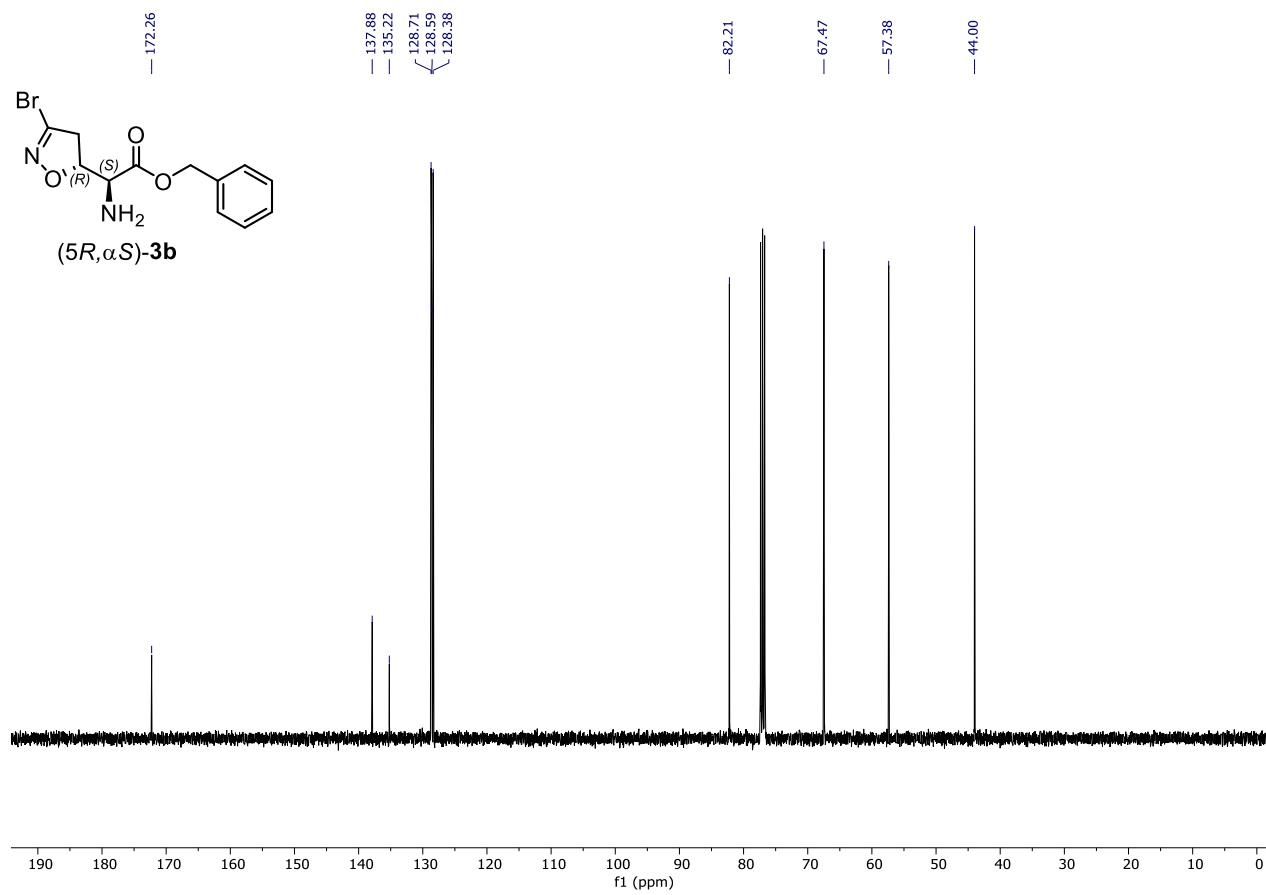

Benzyl (*R*)-2-amino-2-((*R*)-3-bromo-4,5-dihydroisoxazol-5-yl)acetate (**3d**):

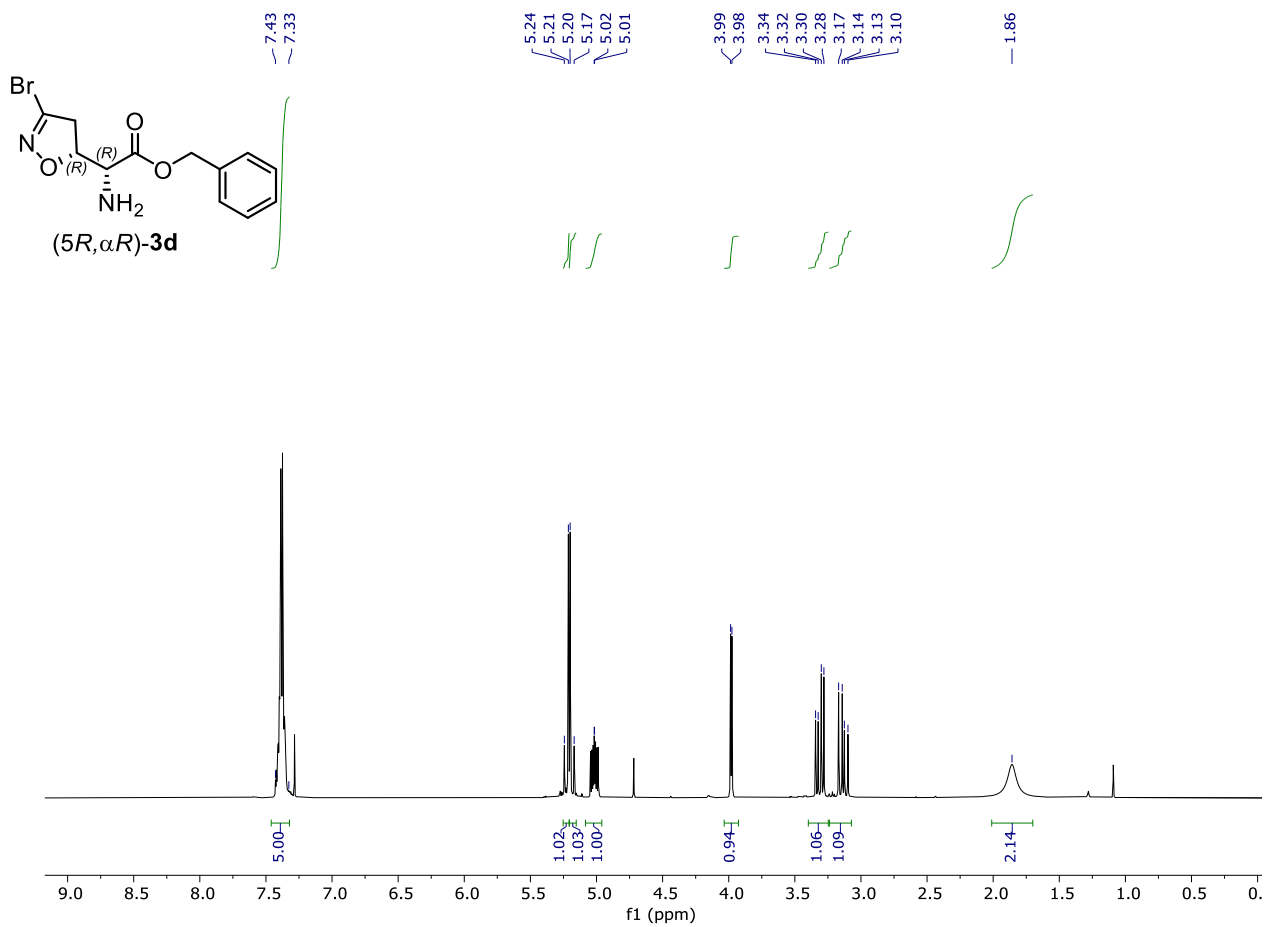

Benzyl (*R*)-2-amino-2-((*R*)-3-bromo-4,5-dihydroisoxazol-5-yl)acetate (**3d**):

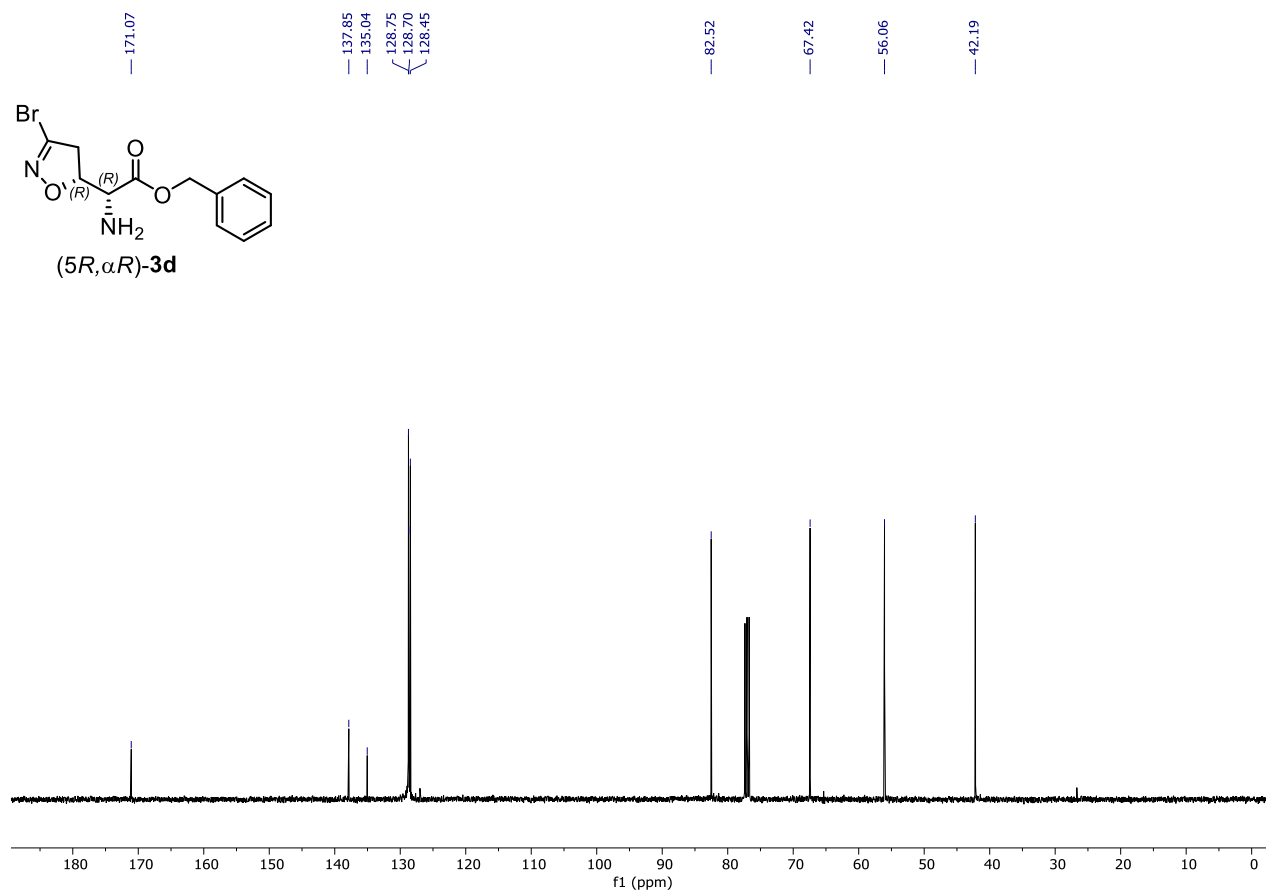

(*S*)-2-amino-*N*-benzyl-2-((*R*)-3-bromo-4,5-dihydroisoxazol-5-yl)acetamide (**4b**):

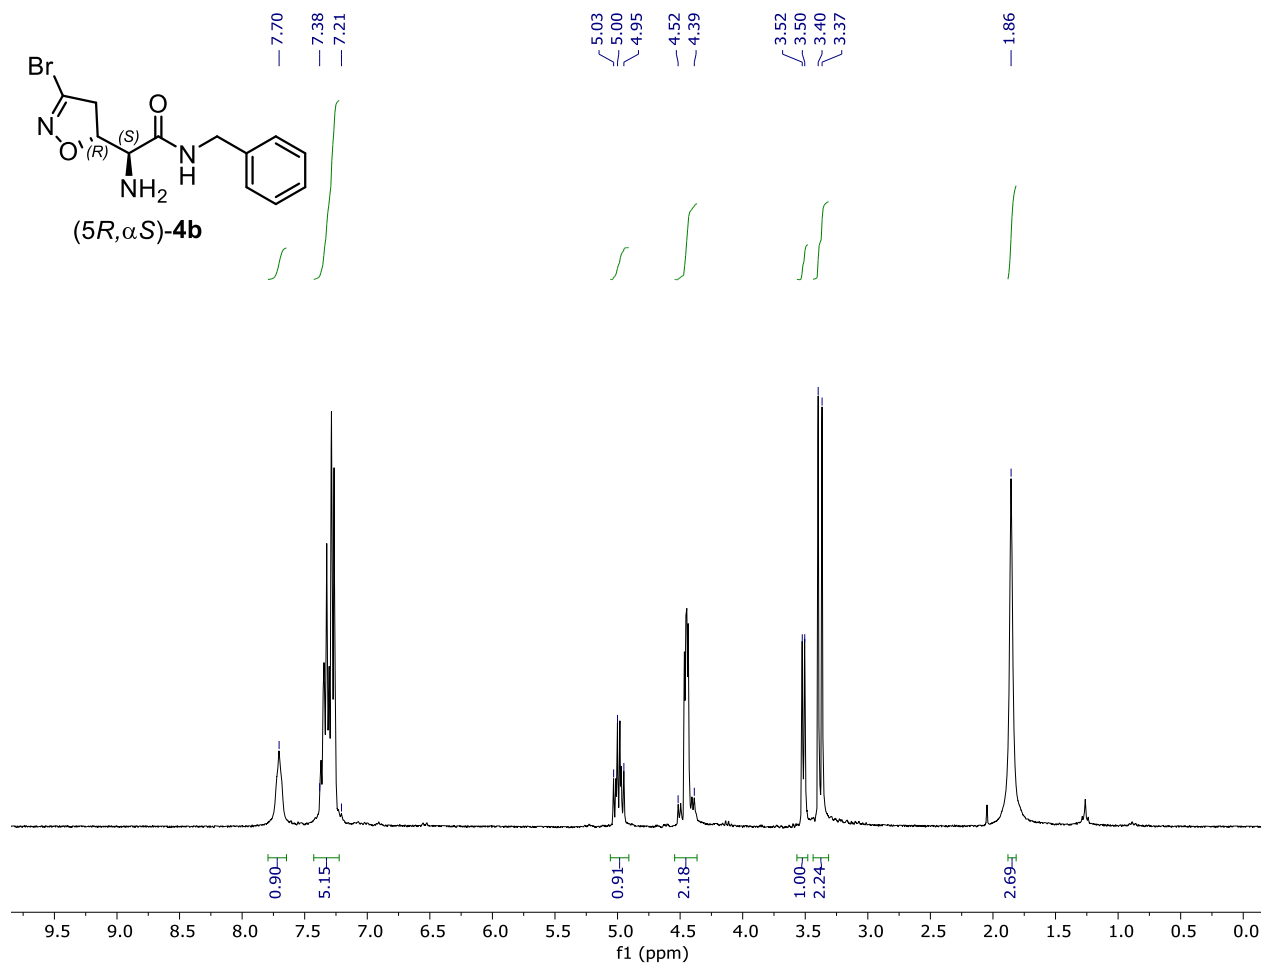

(*S*)-2-amino-*N*-benzyl-2-((*R*)-3-bromo-4,5-dihydroisoxazol-5-yl)acetamide (**4b**):

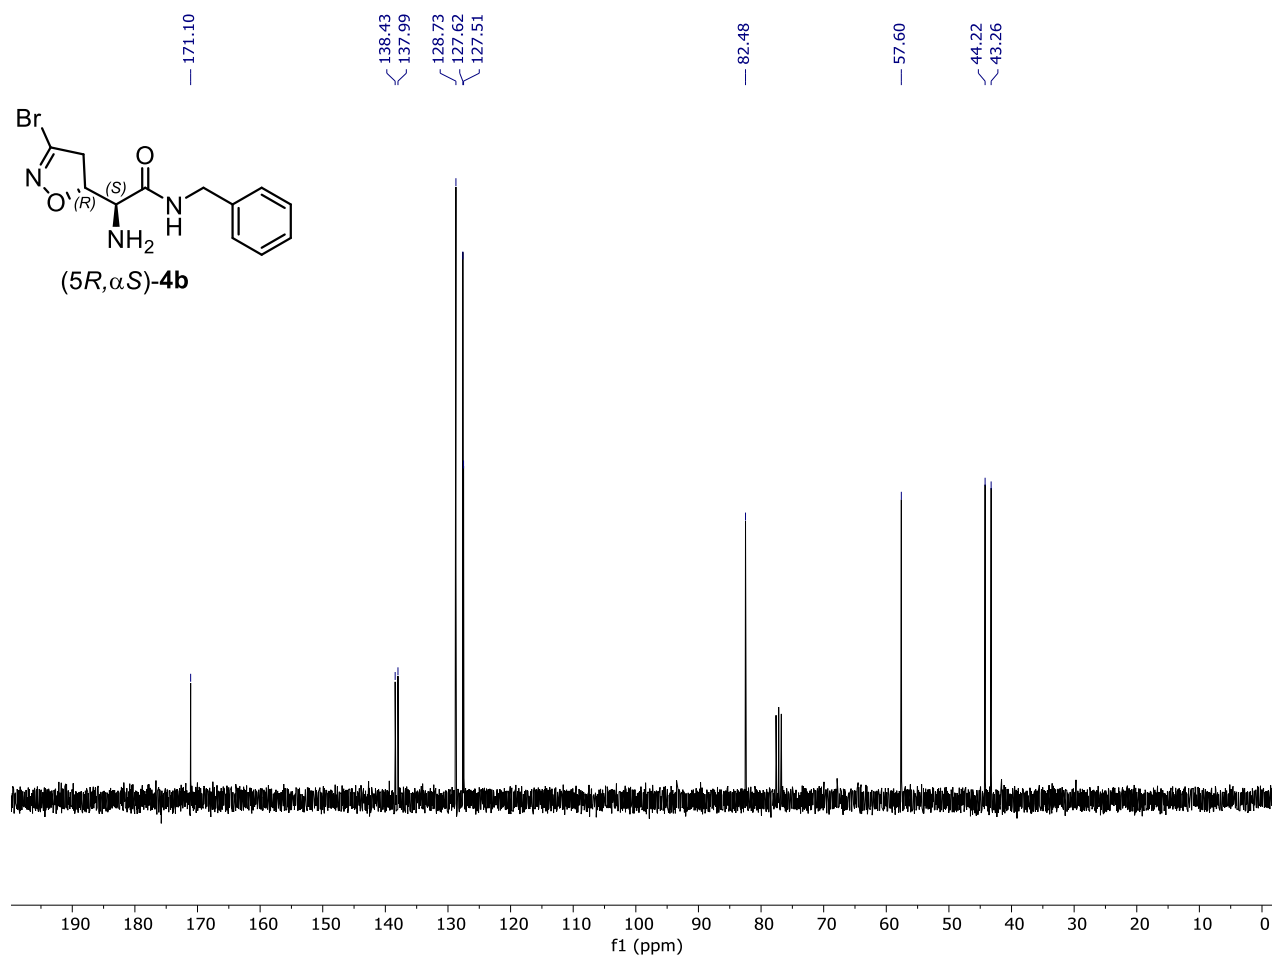



(*R*)-2-amino-*N*-benzyl-2-((*R*)-3-bromo-4,5-dihydroisoxazol-5-yl)acetamide (**4d**):

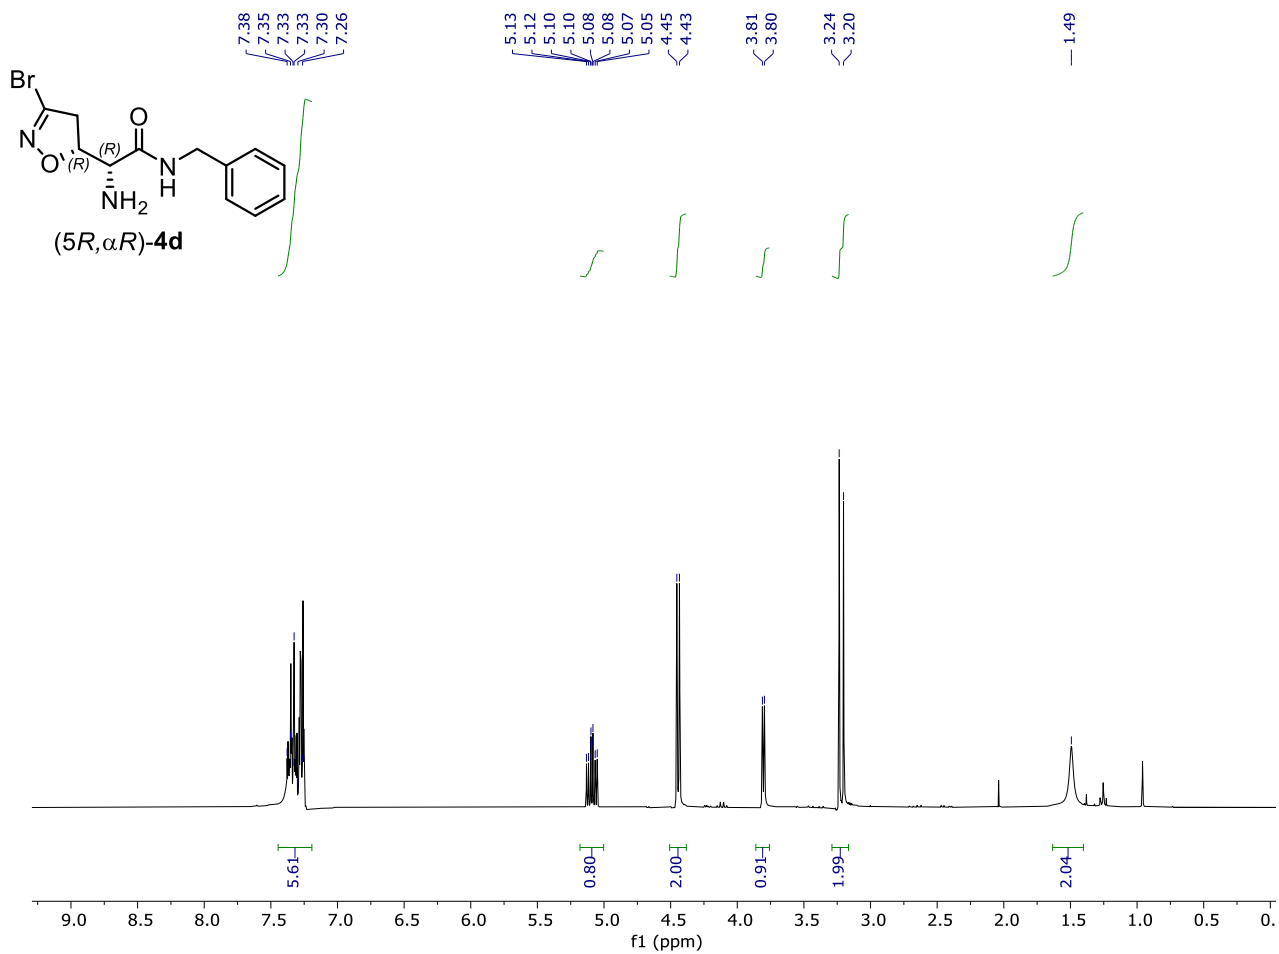

(*R*)-2-amino-*N*-benzyl-2-((*R*)-3-bromo-4,5-dihydroisoxazol-5-yl)acetamide (**4d**):

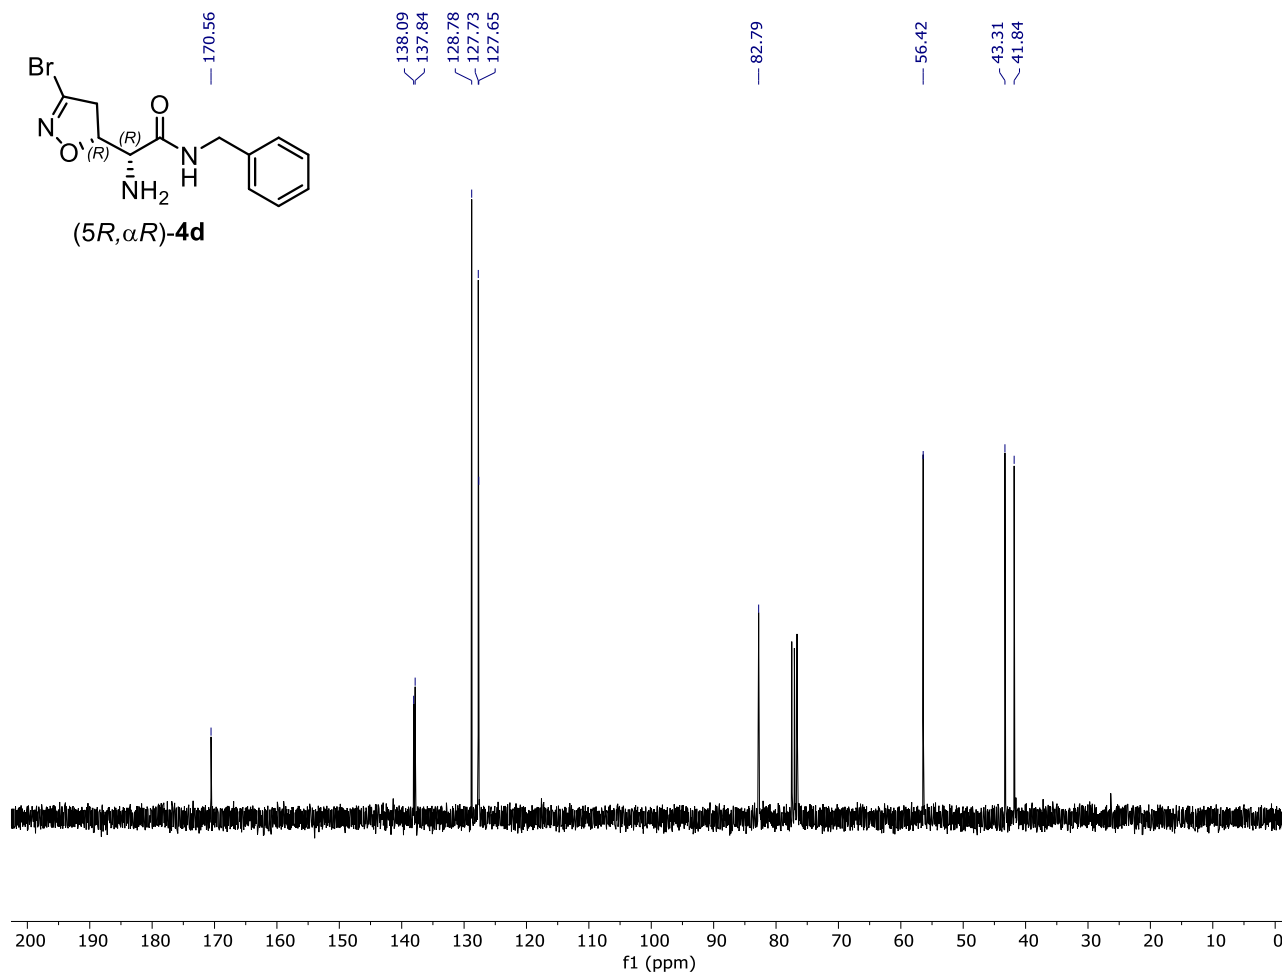

Supplement: s1 [file s1]
